# Supplementary material for: Design and evaluation of an e-governance ICT solution to empower the non-literate vegetable market consumers
Source: PeerJ journal article supplement (doi:10.7717/peerj-cs.3150), 2025-09-23
Supplement: Appendix_B.docx [file Appendix_B.docx]

Appendix B: Two highest-voted icons from the first phase representing each action

| شبیہیں Icons | | شبیہوں کے نام | شبیہیں Icons | | شبیہوں کے نام |
| --- | --- | --- | --- | --- | --- |
| 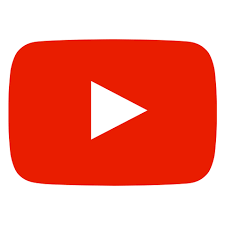 | 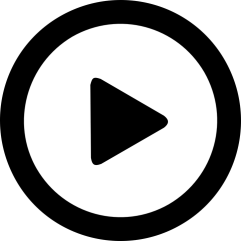 | آڈیو, ویڈیو چلائیں  Play (audio, video) | 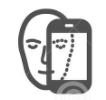 | 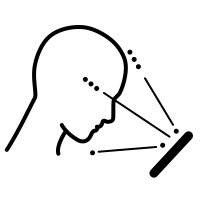 | چہرے کی شناخت  Face recognition |
| 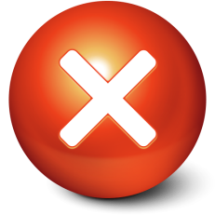 | 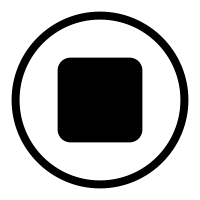 | آڈَیو، وڈیو بند کریں  Stop (audio, video) | 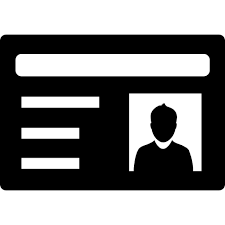 | 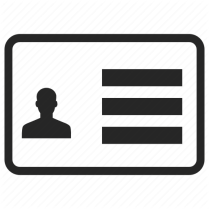 | شناختی کارڈ نمبر  ID card No |
| 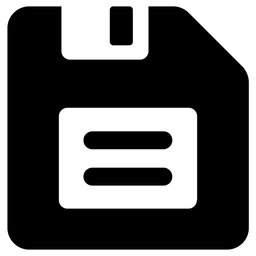 | 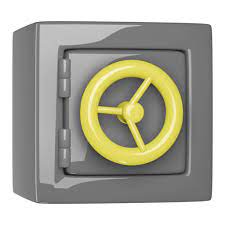 | محفوظ کریں  Save | 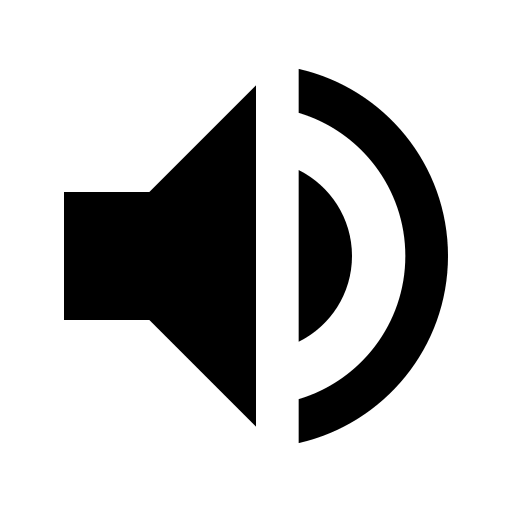 | 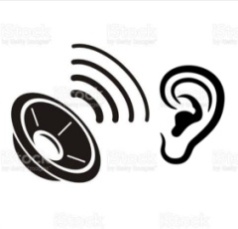 | آڈیو میں مدد  Audio  assistance |
| 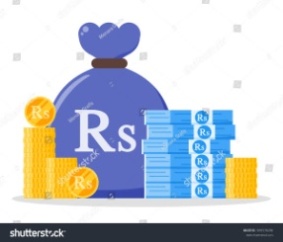 | 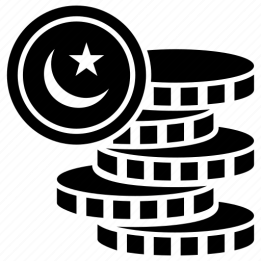 | متنازعہ قیمت  Controversial price | 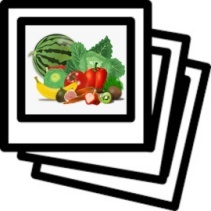 | 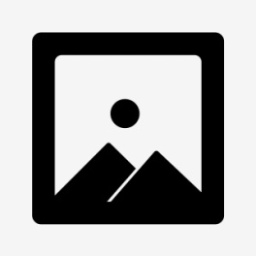 | گیلری  Gallery |
| 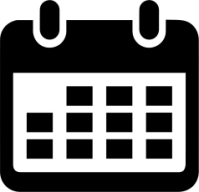 | 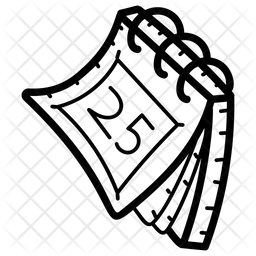 | تاریخ  Date | 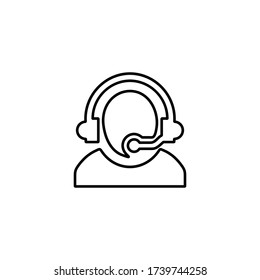 | 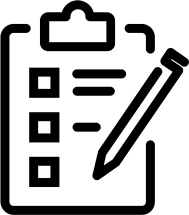 | شکا یت کا اندراج  Complaint registration |
| 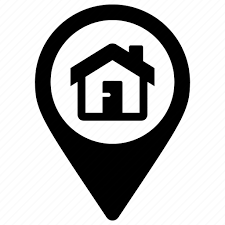 | 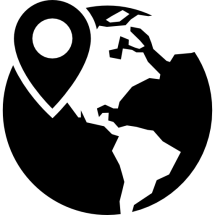 | مقام  Location | 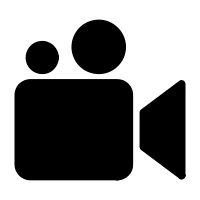 | 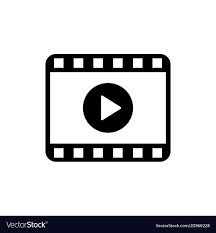 | ویڈیو ریکارڈنگ  Video recording |
| 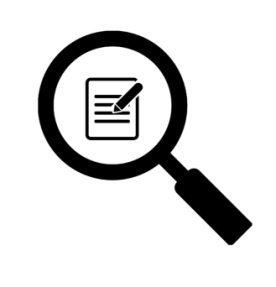 | 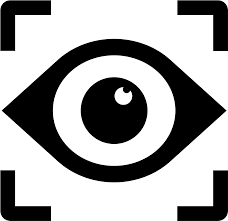 | شکایات کا سراغ لگانا  Complaints tracking | 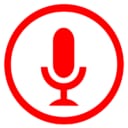 | 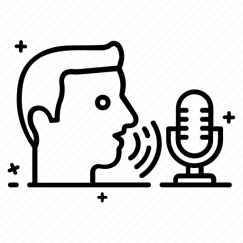 | آڈیو ریکارڈنگ  Audio recording |

| **Mapping of tasks to the icons used in the tasks** | | | | | | |
| --- | --- | --- | --- | --- | --- | --- |
| **Tasks** | **Icon Used 1** | **Icons Used 2** | **Icons Used 3** | **Icons Used 4** | **Icons Used 5** | **Icons Used 6** |
| Task 1: **Logging into the application** | 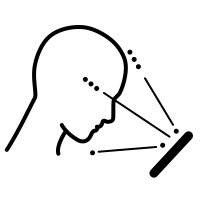 | 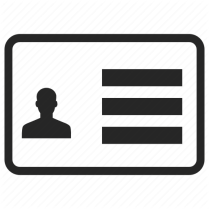 | 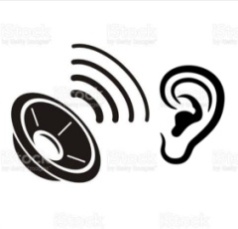 |  |  |  |
| Task 2: **Recognition of any fruit/vegetable and taking results about their price** | 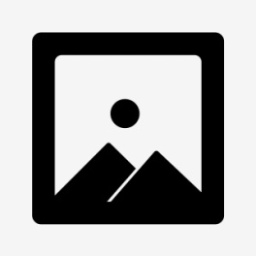 | 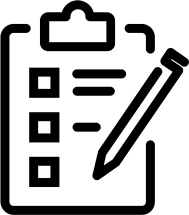 | 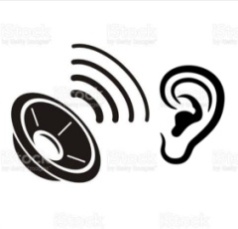 | 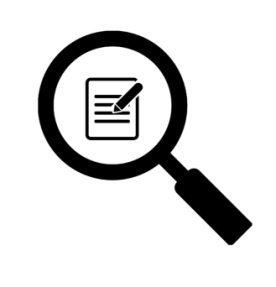 |  |  |
| Task 3: **Accessing built-in gallery** | 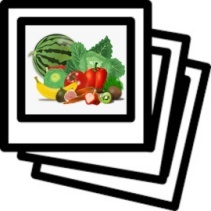 |  | 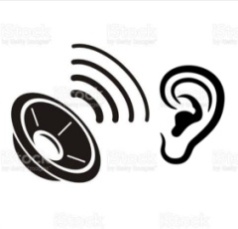 |  |  |  |
| Task 4: **Register complaints on finding price discrepancy** | 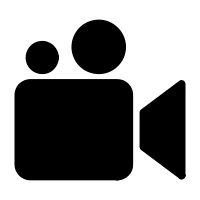 | 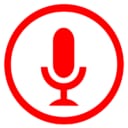 | 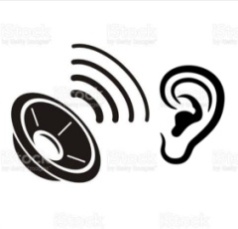 | 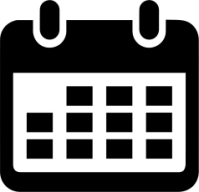 | 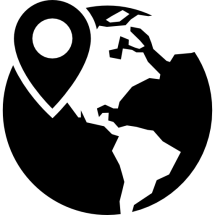 | 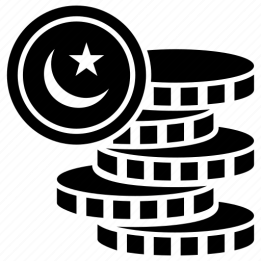 |
| Task 5: **Finding out any previously registered complaint and telling the researcher about their complaint status** | 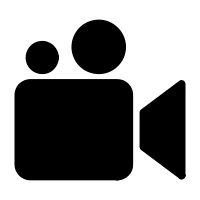 | 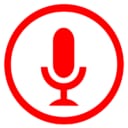 | 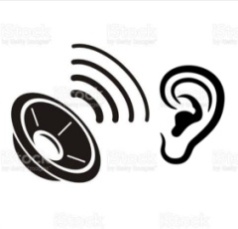 | 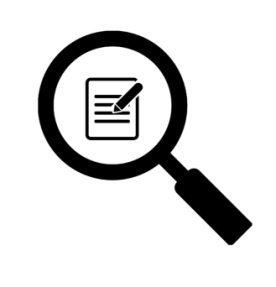 |  |  |
