# Supplementary material for: Design and evaluation of an e-governance ICT solution to empower the non-literate vegetable market consumers
Source: PeerJ journal article supplement (doi:10.7717/peerj-cs.3150), 2025-09-23
Supplement: Application_Screens.docx [file Application_Screens.docx]

**Appendix D –** FVHMA Application Screens

**
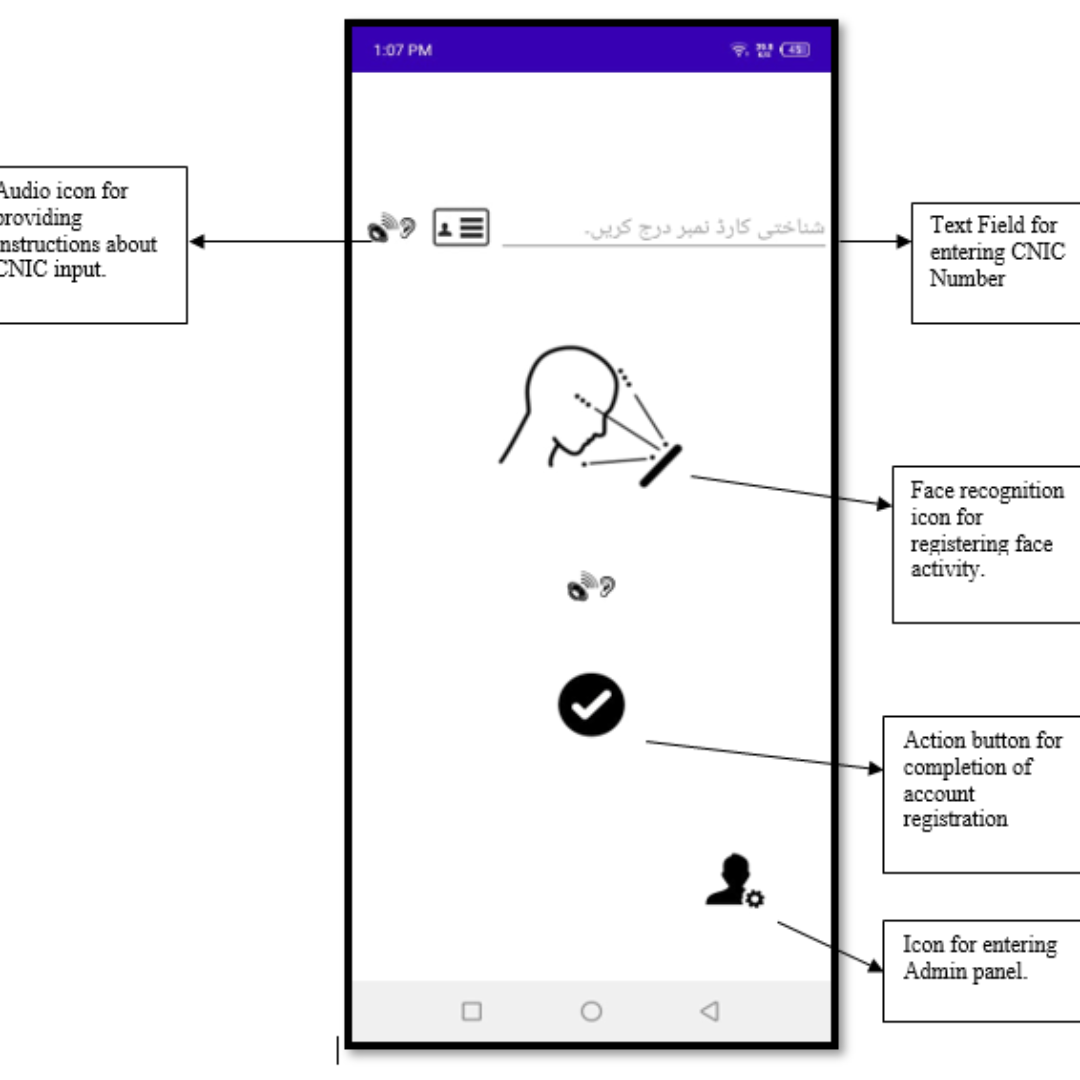
**

**Figure 1**

**
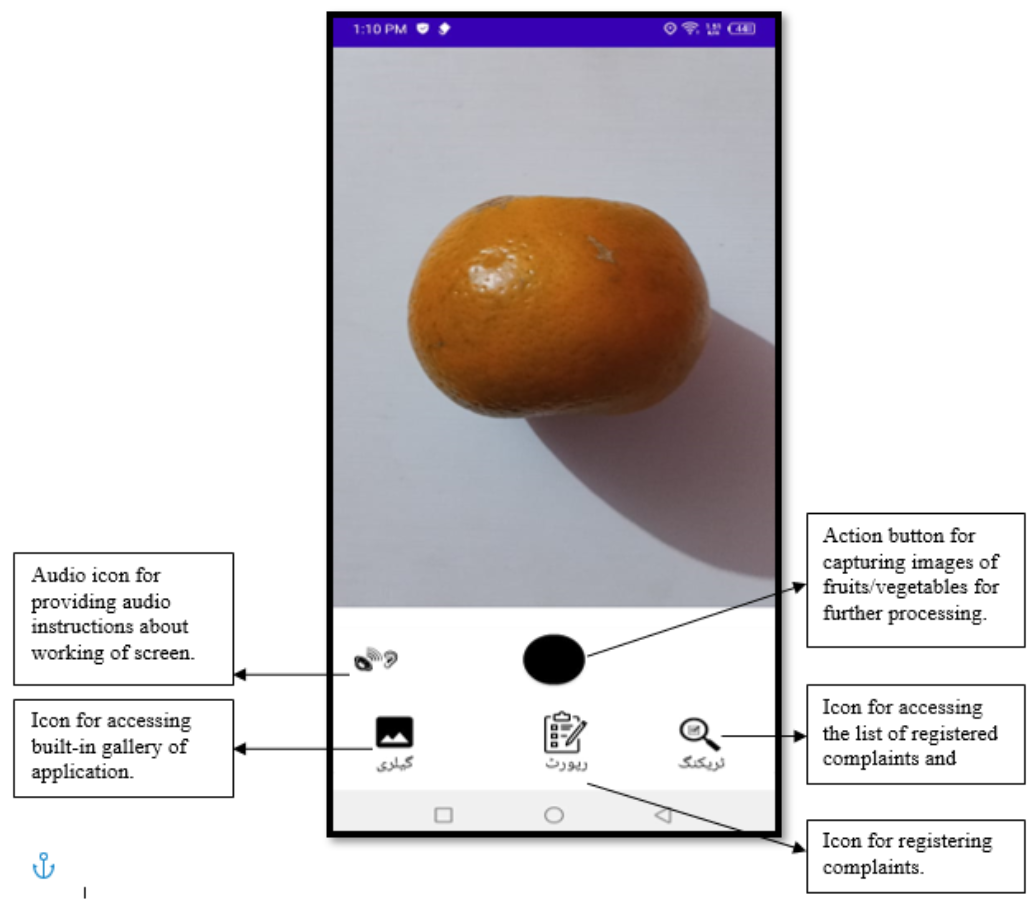
**

**Figure 2**

**
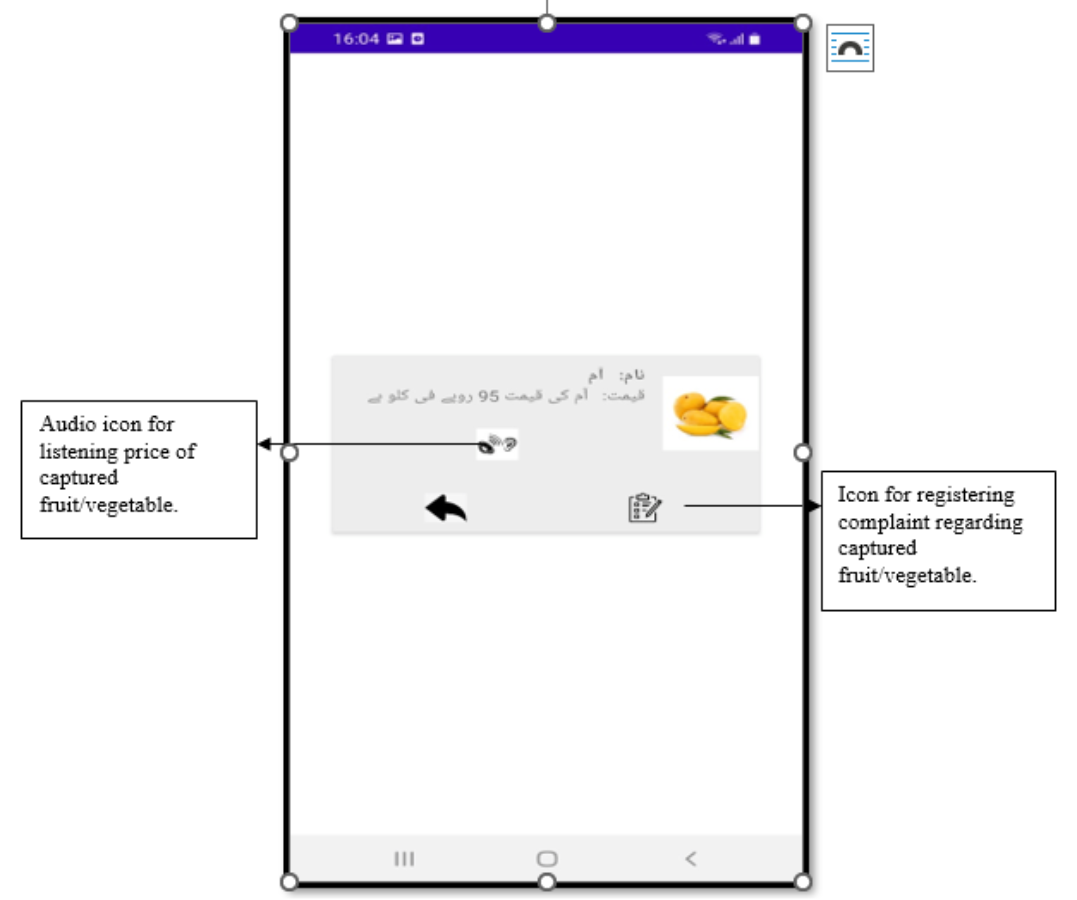
**

**Figure 3**

**
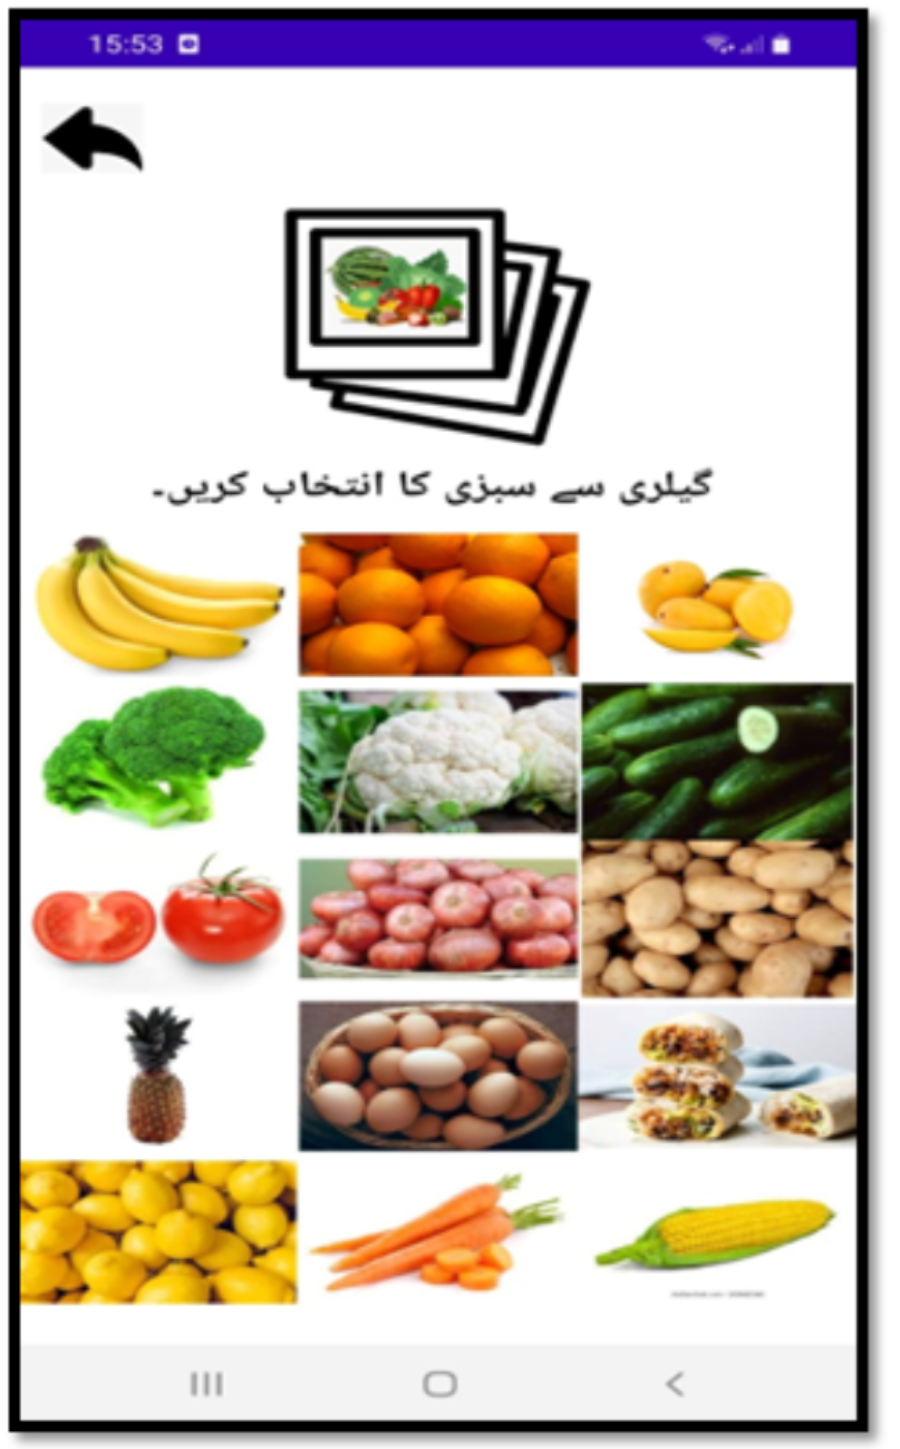
**

**Figure 4**

**
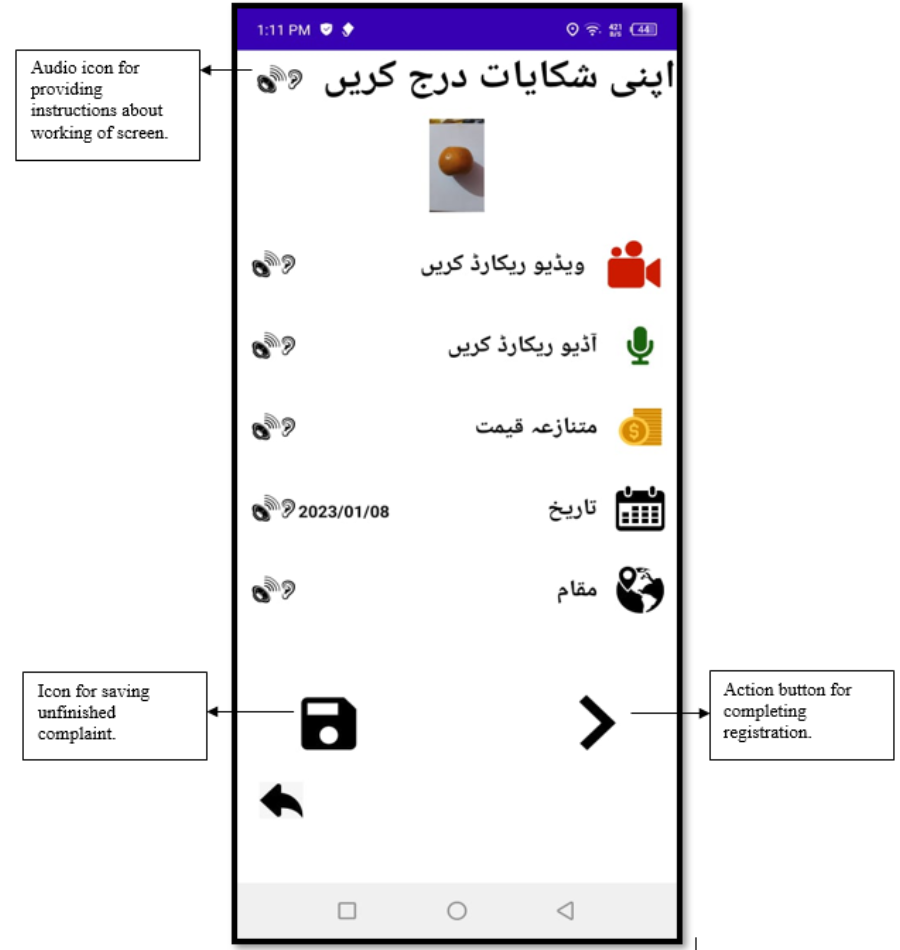
**

**Figure 5**

**
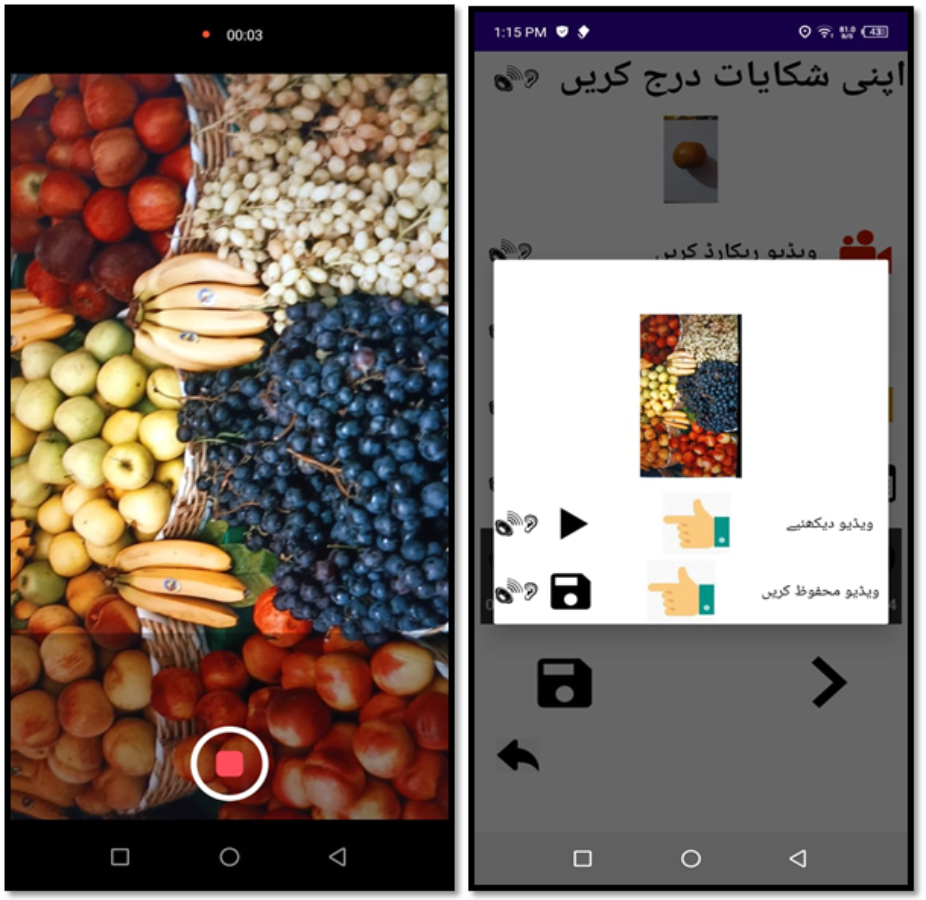
**

**Figure 6a & 6b**

**
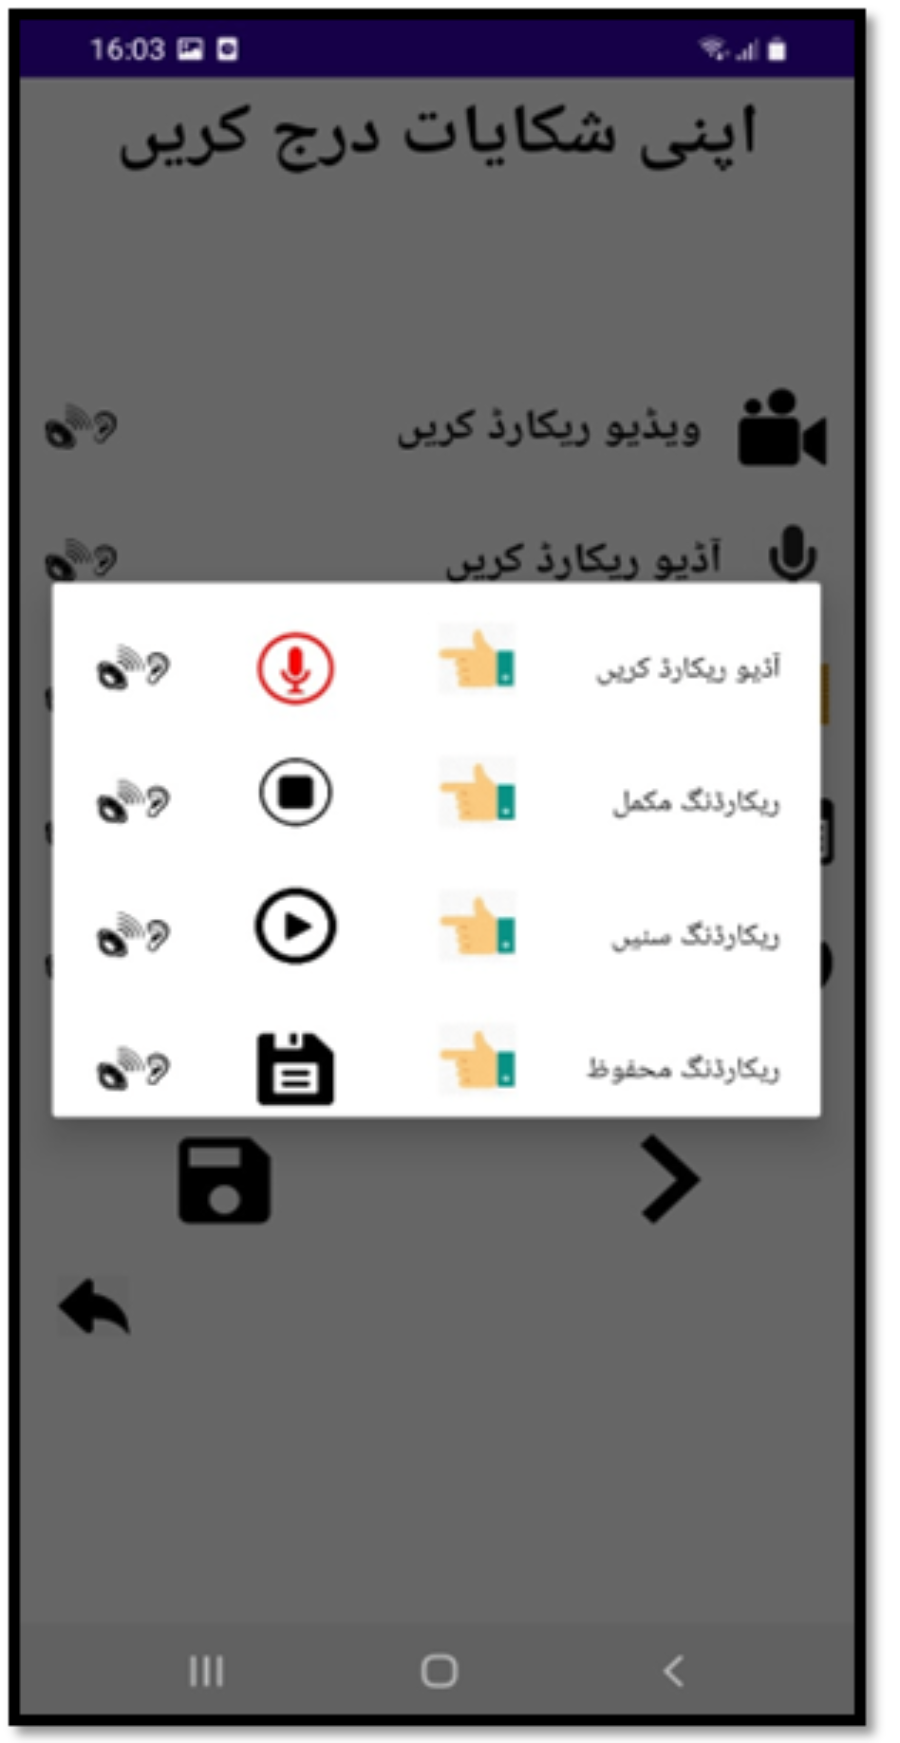
**

**Figure 7**

**
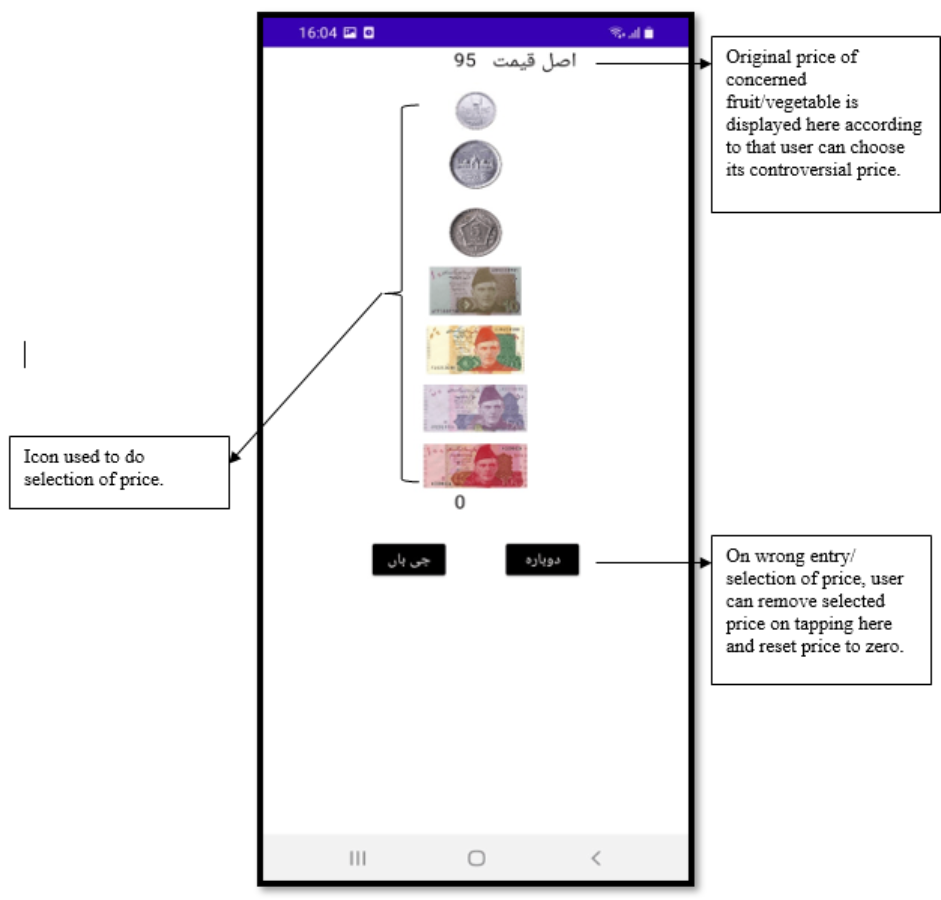
**

**Figure 8**

**
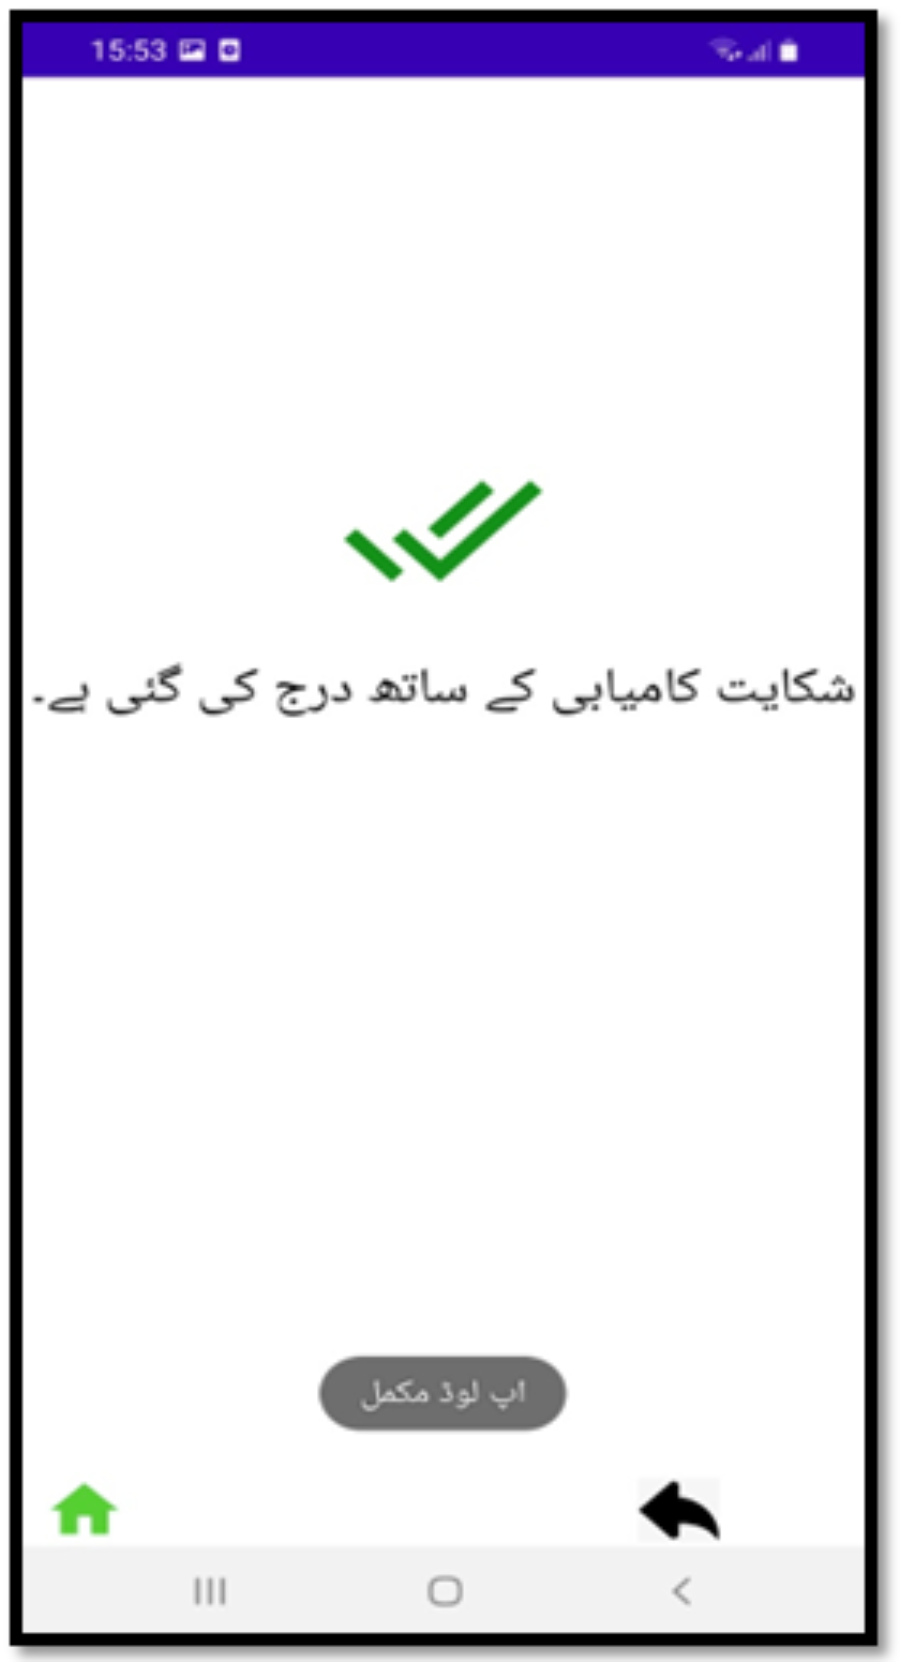
**

**Figure 9**

**
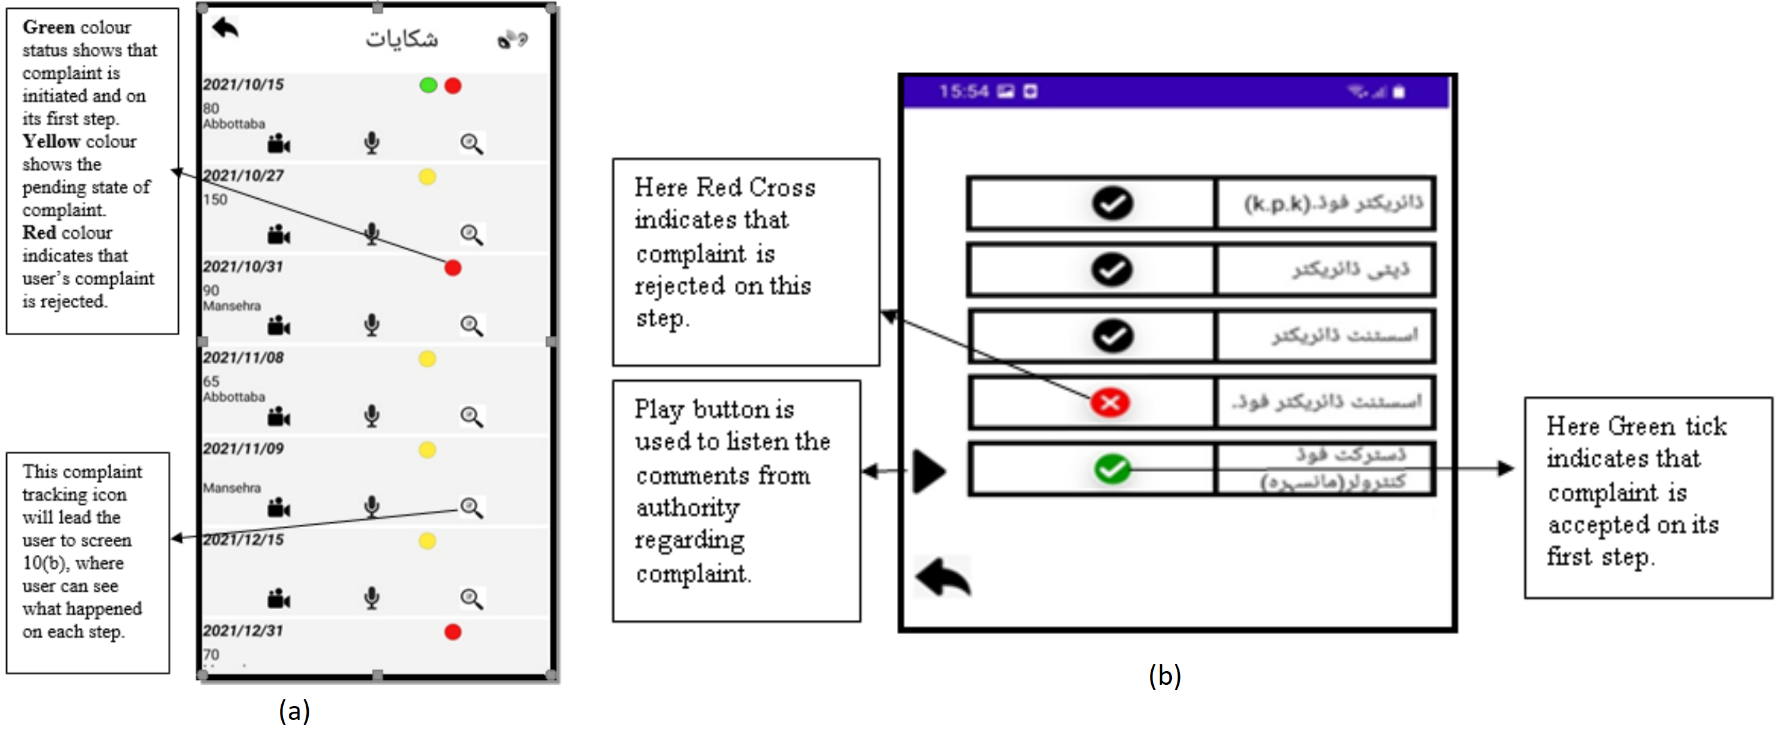
**

**Figure 10a & 10b**

**
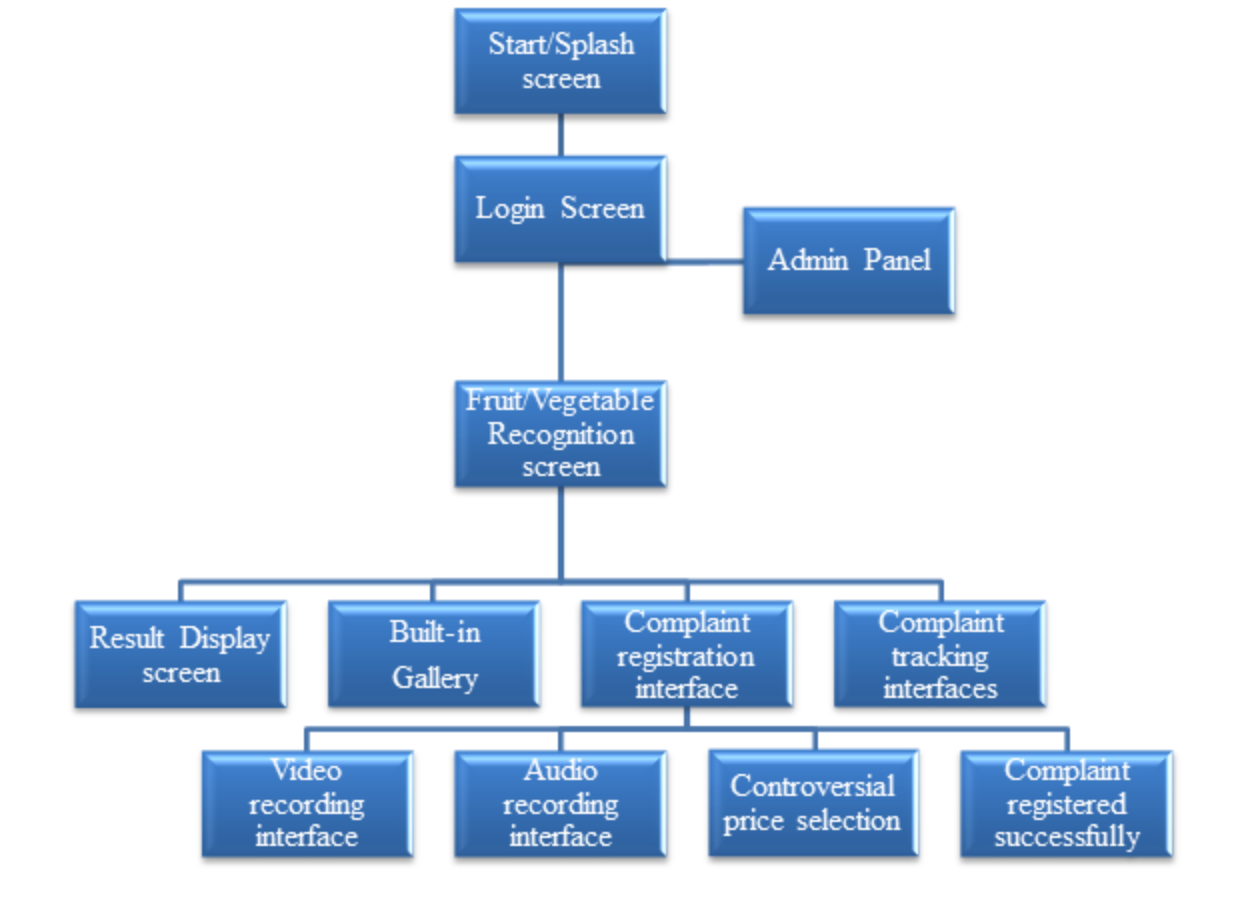
**

**Figure 11**
