# Supplementary material for: Design and evaluation of an e-governance ICT solution to empower the non-literate vegetable market consumers
Source: PeerJ journal article supplement (doi:10.7717/peerj-cs.3150), 2025-09-23
Supplement: Data_for_submission.zip [file Appendix A.docx]

" Market Helper Vegetable" ایپلیکیشن میں استعمال ہونے والی شبیہوں کے لیے

تشخیصی فارم

|  | شبیہیں Icons | | | | شبیہوں کے نام |
| --- | --- | --- | --- | --- | --- |
| 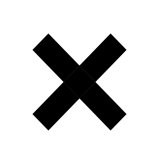 | 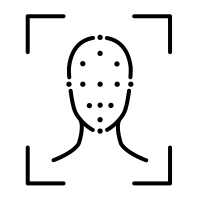 | 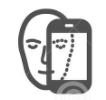 | 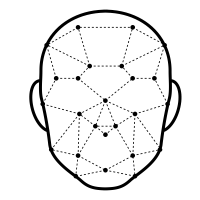 | 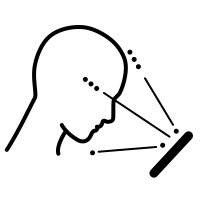 | چہرے کی شناخت  Face recognition |
| 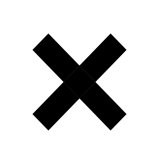 | 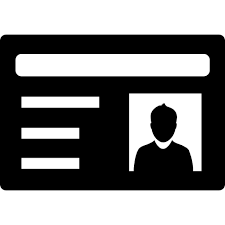 | 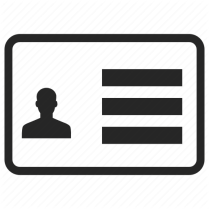 | 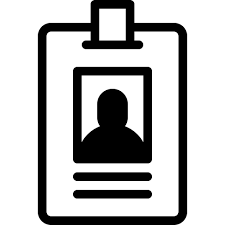 | 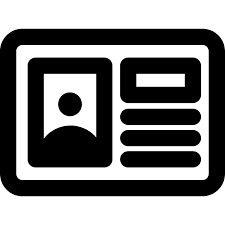 | شناختی کارڈ نمبر  ID card No |
| 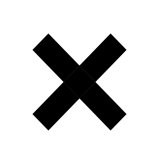 | 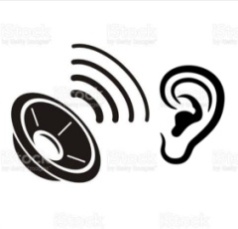 | 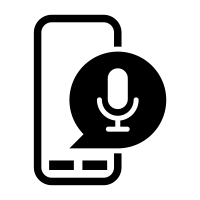 | 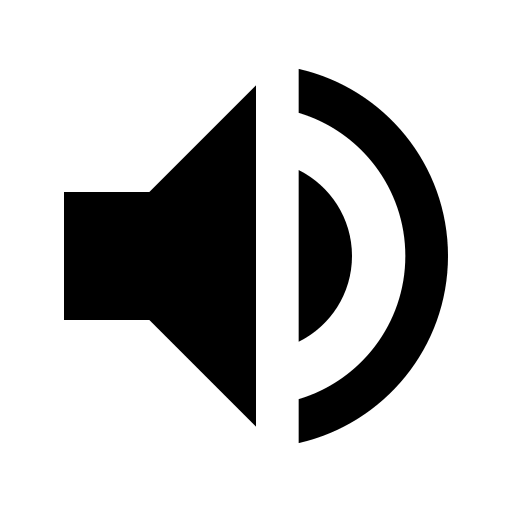 | 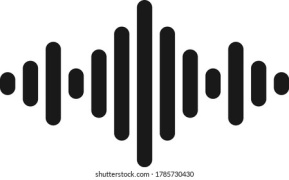 | آڈیو میں مدد  Audio  assistance |
| 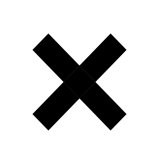 | 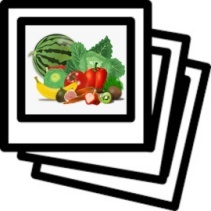 | 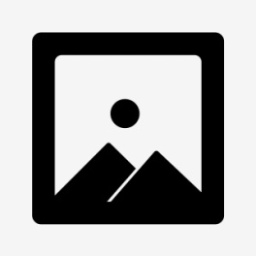 | 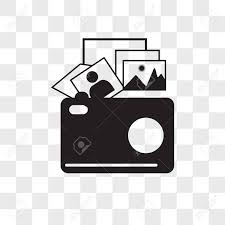 | 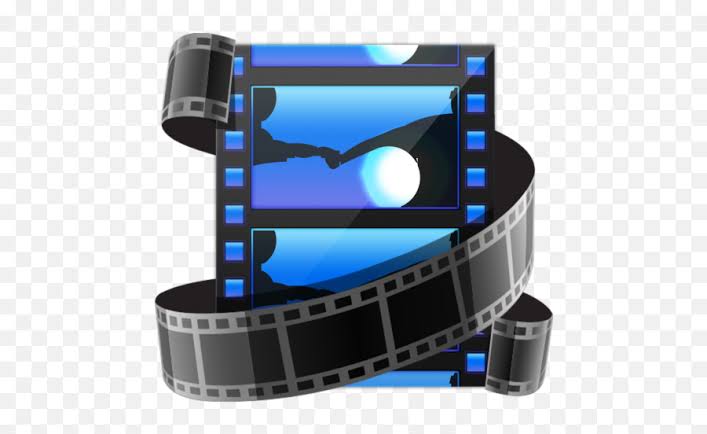 | گیلری  Gallery |
| 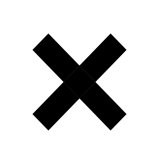 | 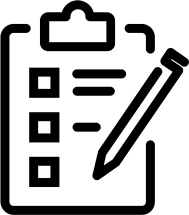 | 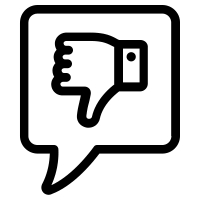 | 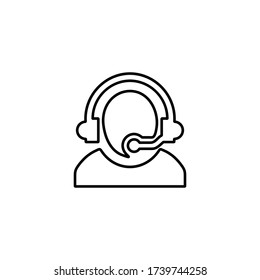 | 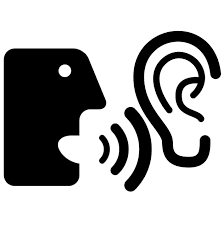 | شکا یت کا اندراج  Complaint registration |
| 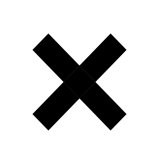 | 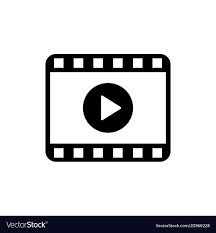 | 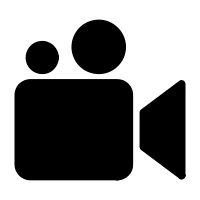 | 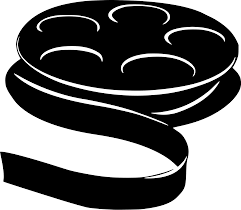 | 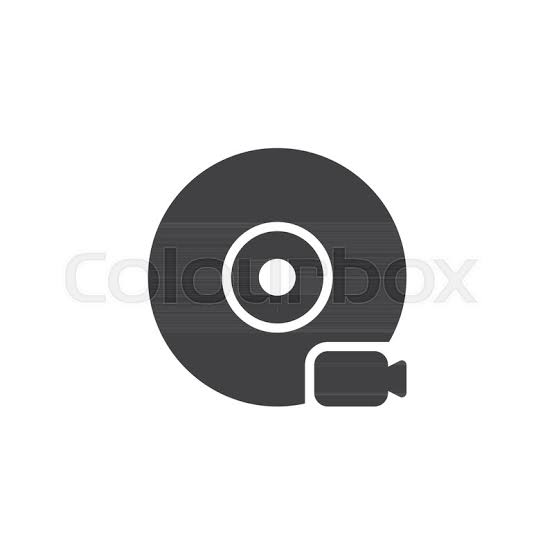 | ویڈیو ریکارڈنگ  Video recording |
| 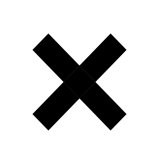 | 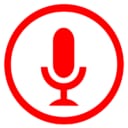 | 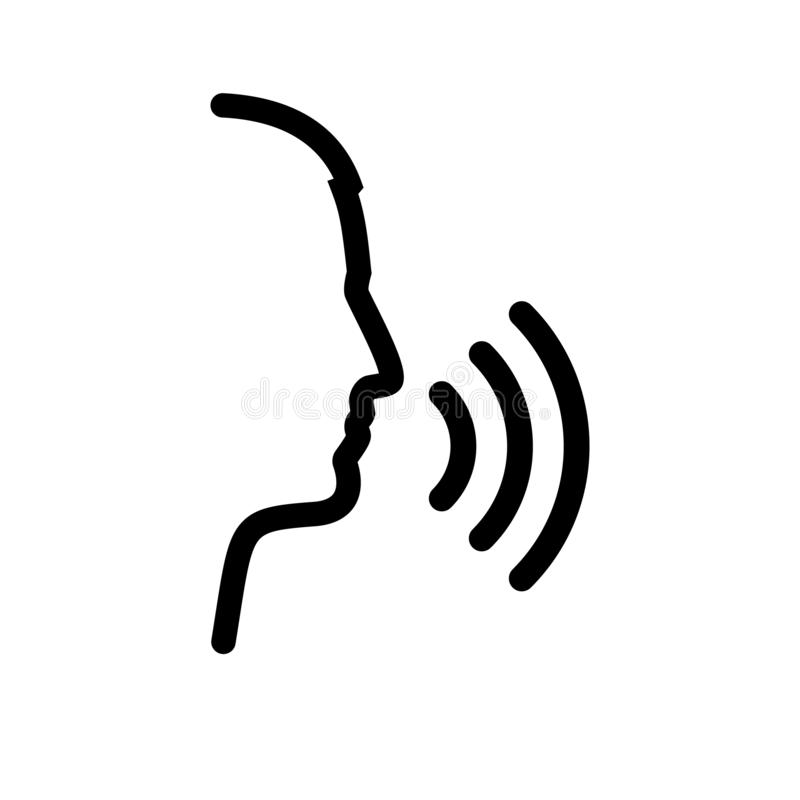 | 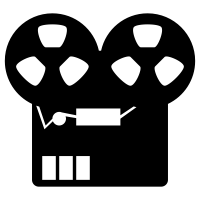 | 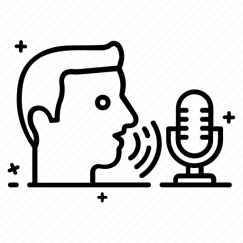 | آڈیو ریکارڈنگ  Audio recording |
| 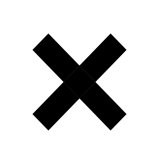 | 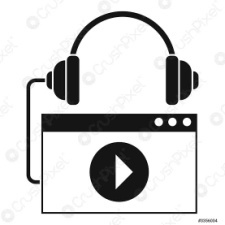 | 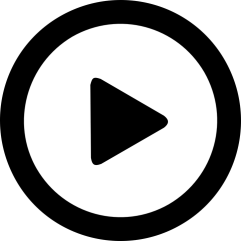 | 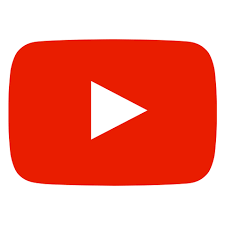 | 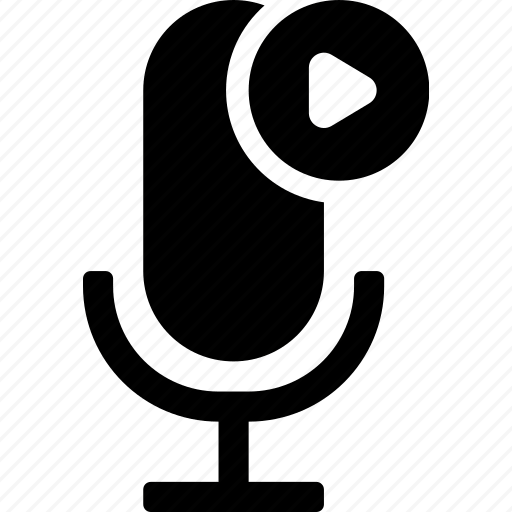 | آڈیو, ویڈیو چلائیں  Play (audio, video) |
| 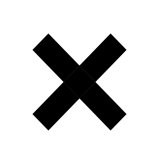 | 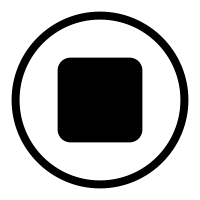 | 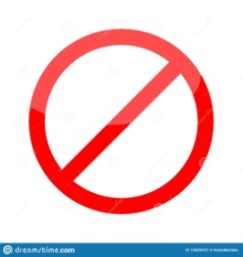 | 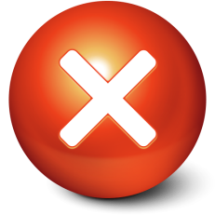 | 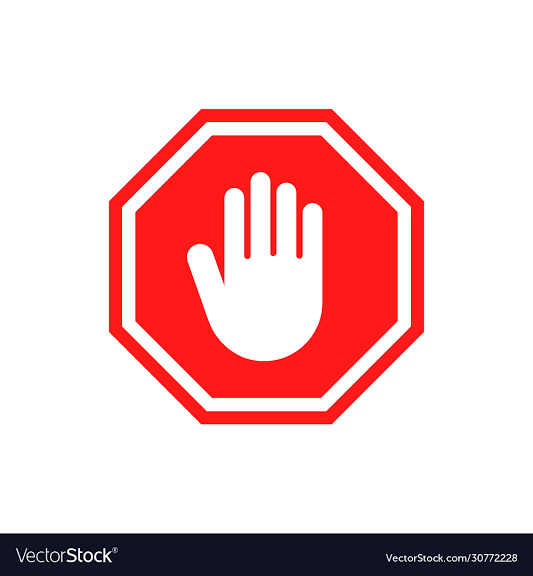 | آڈَیو، وڈیو بند کریں  Stop (audio, video) |
| 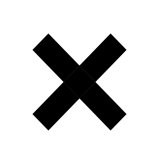 | 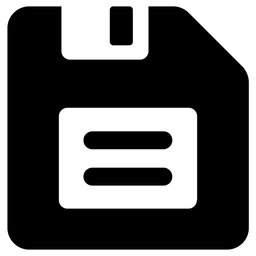 | 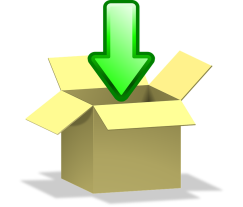 | 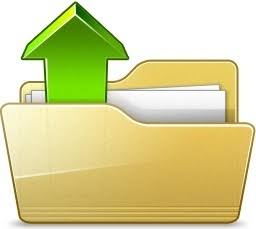 | 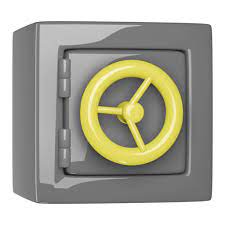 | محفوظ کریں  Save |
| 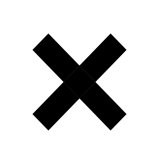 | 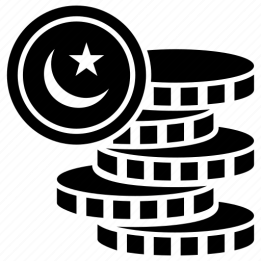 | 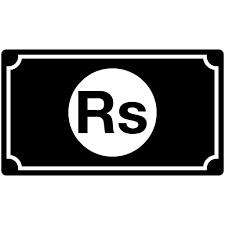 | 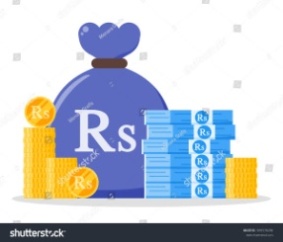 | 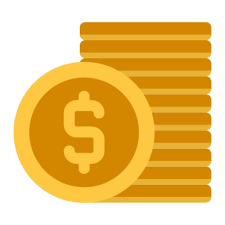 | متنازعہ قیمت  Controversial price |
| 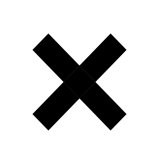 | 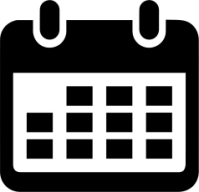 | 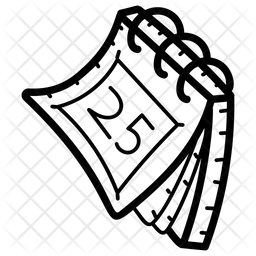 | 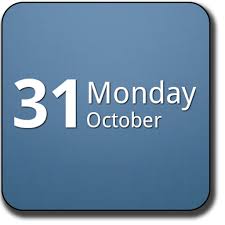 | 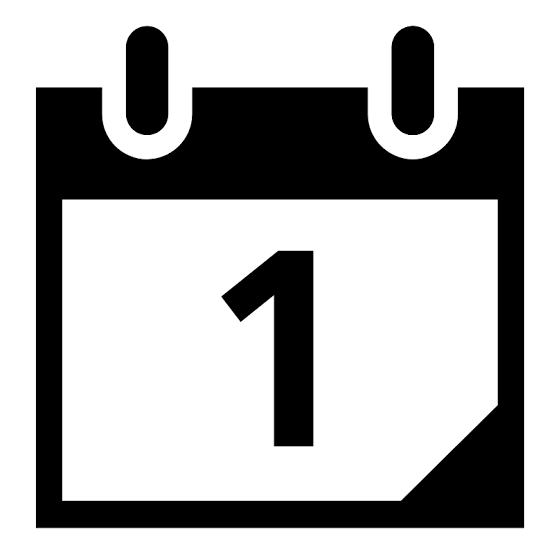 | تاریخ  Date |
| 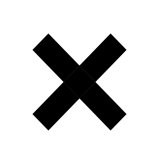 | 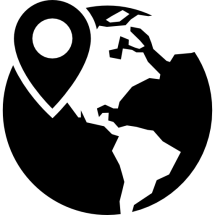 | 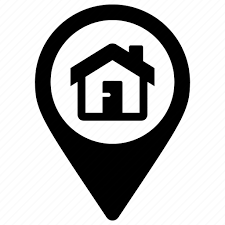 | 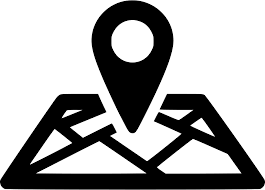 | 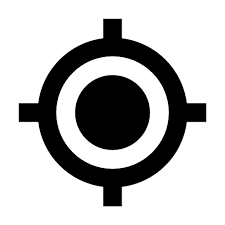 | مقام  Location |
| 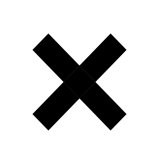 | 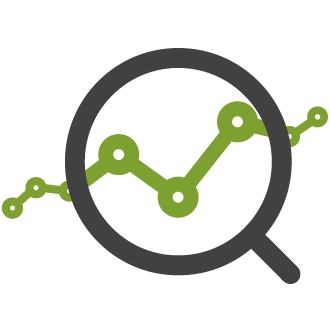 | 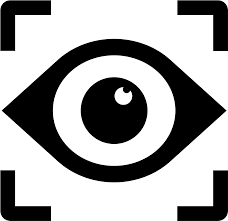 | 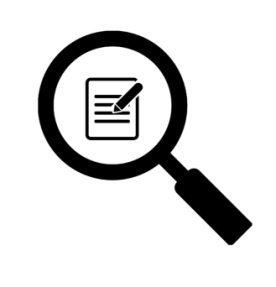 | 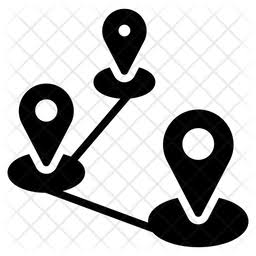 | شکایات کا سراغ لگانا  Complaints tracking |
