# Supplementary material for: Design and evaluation of an e-governance ICT solution to empower the non-literate vegetable market consumers
Source: PeerJ journal article supplement (doi:10.7717/peerj-cs.3150), 2025-09-23
Supplement: Data_for_submission.zip [file Assessment form 1 results.docx]

" Market Helper Vegetable" ایپلیکیشن میں استعمال ہونے والی شبیہوں کے لیے

تشخیصی فارم کے نتائج

|  | شبیہیں Icons | | | | شبیہوں کے نام |
| --- | --- | --- | --- | --- | --- |
| 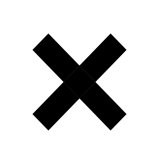  0 | 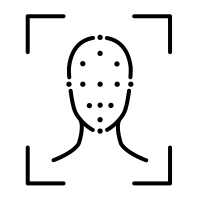  9 | 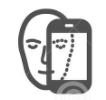14 | 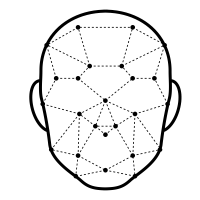  2 | 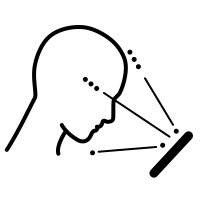10 | چہرے کی شناخت  Face recognition |
| 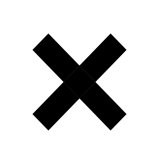  0 | 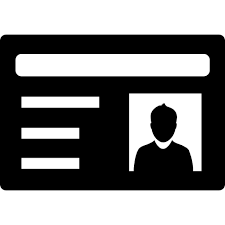  20 | 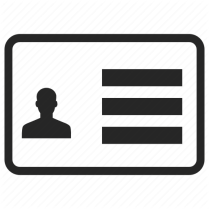  8 | 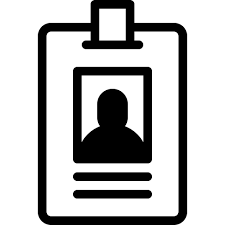  3 | 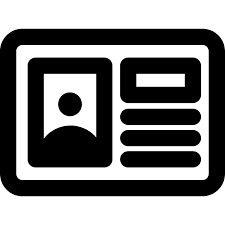  4 | شناختی کارڈ نمبر  ID card No |
| 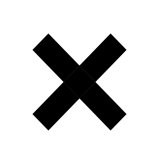  0 | 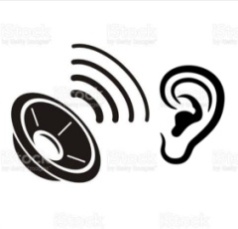  12 | 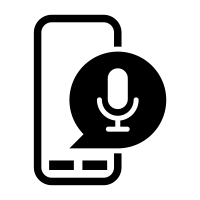  6 | 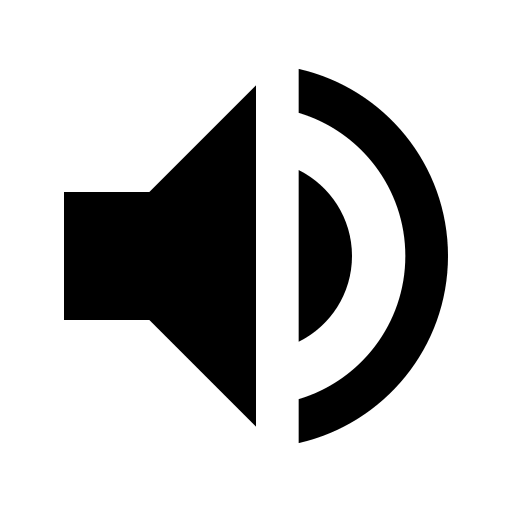  15 | 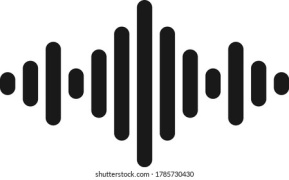  2 | آڈیو میں مدد  Audio  assistance |
| 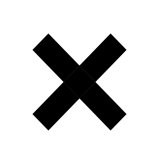  0 | 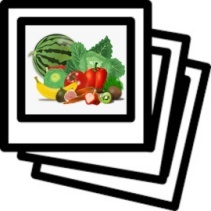  11 | 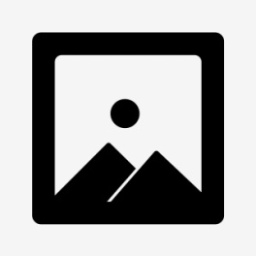  20 | 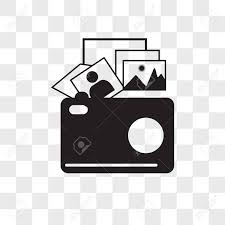  3 | 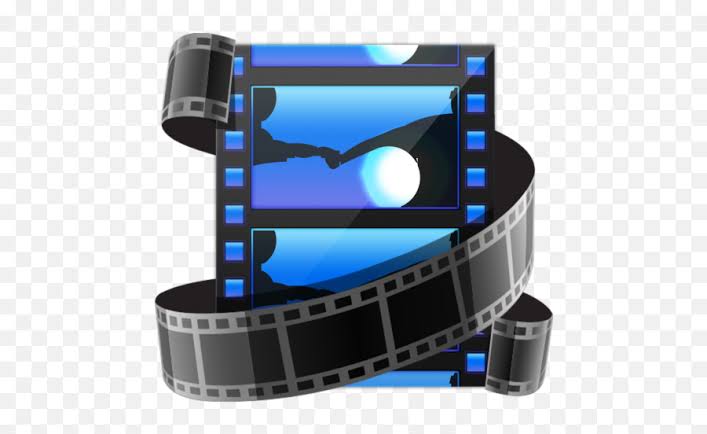  1 | گیلری  Gallery |
| 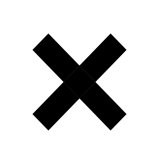  2 | 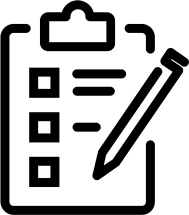  21 | 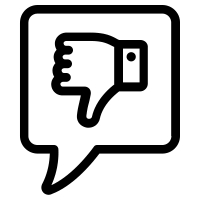  0 | 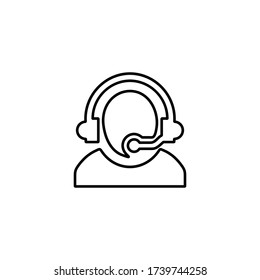  10 | 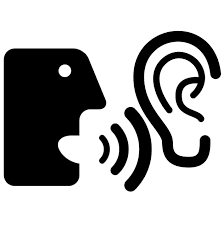  2 | شکا یت کا اندراج  Complaint registration |
| 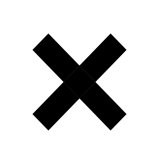  0 | 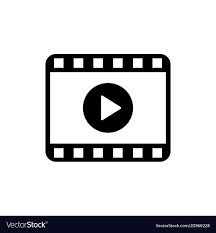  10 | 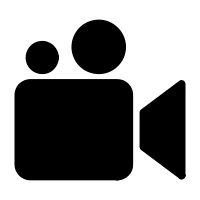  1 | 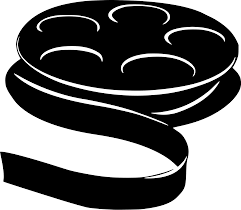  3 | 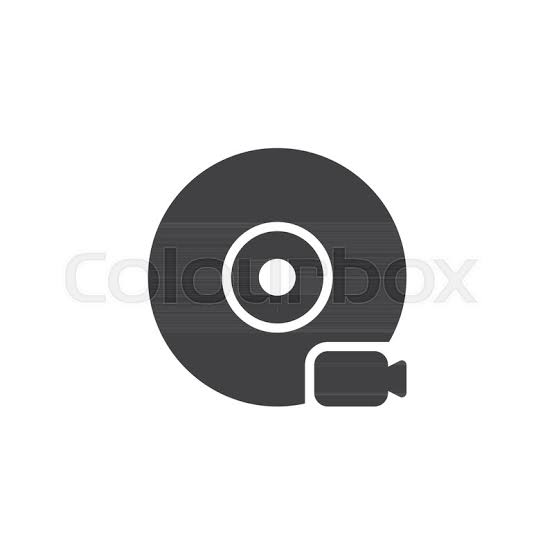  4 | ویڈیو ریکارڈنگ  Video recording |
| 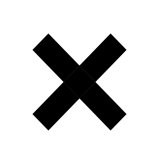  0 | 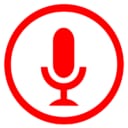  16 | 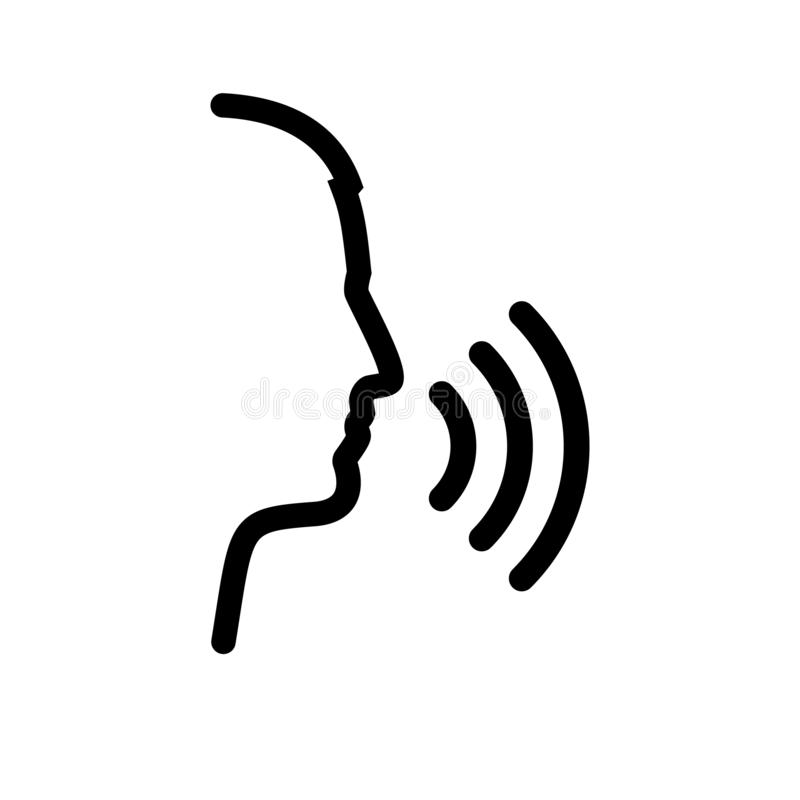  3 | 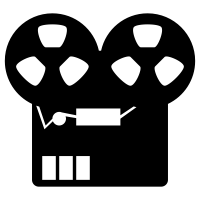  0 | 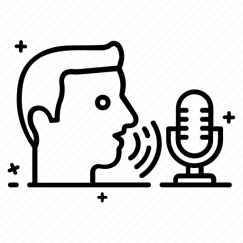  16 | آڈیو ریکارڈنگ  Audio recording |
| 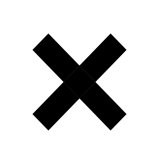  0 | 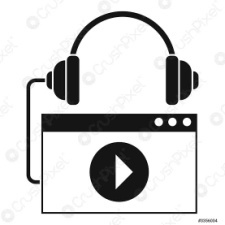  0 | 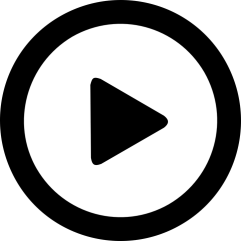  19 | 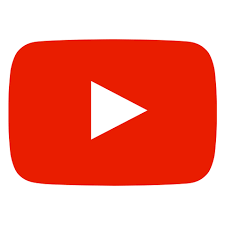  16 | 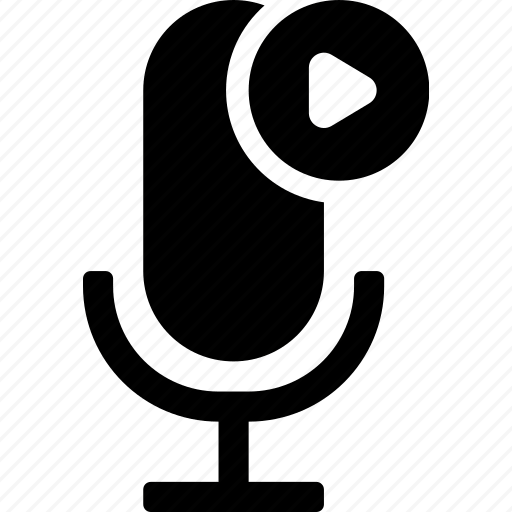  0 | آڈیو, ویڈیو چلائیں  Play (audio, video) |
| 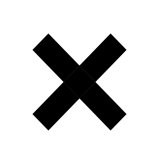  0 | 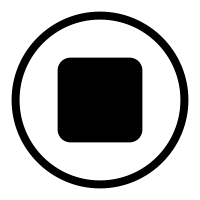  21 | 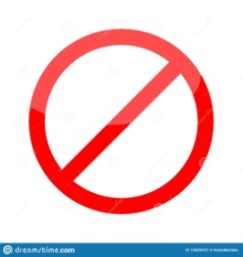  0 | 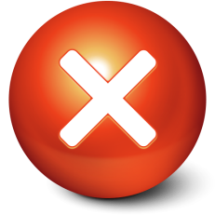  10 | 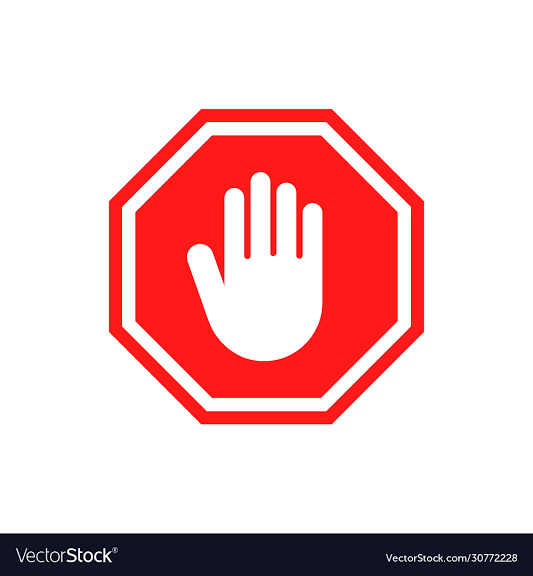  4 | آڈَیو، وڈیو بند کریں  Stop (audio, video) |
| 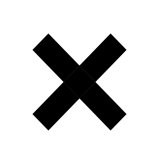  0 | 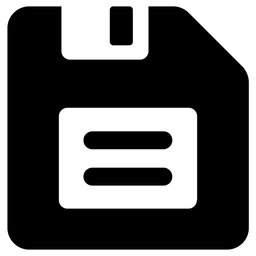  13 | 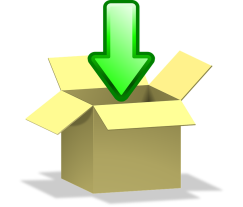  9 | 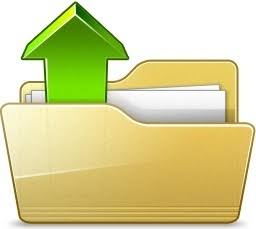  3 | 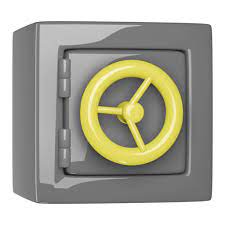  10 | محفوظ کریں  Save |
| 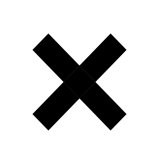  0 | 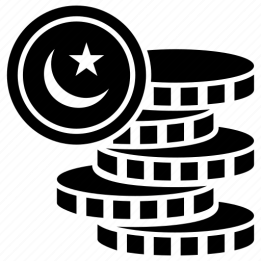  15 | 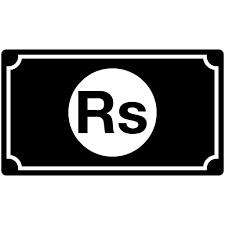  5 | 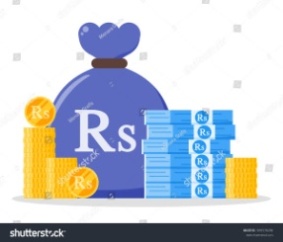  14 | 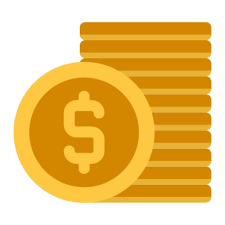  1 | متنازعہ قیمت  Controversial price |
| 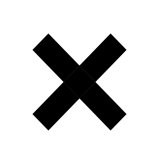  0 | 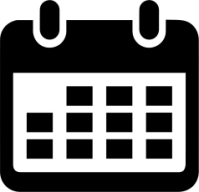  10 | 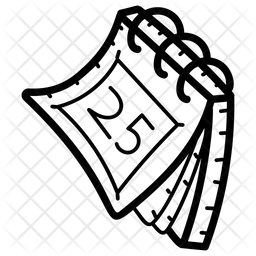  15 | 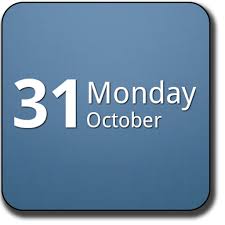  5 | 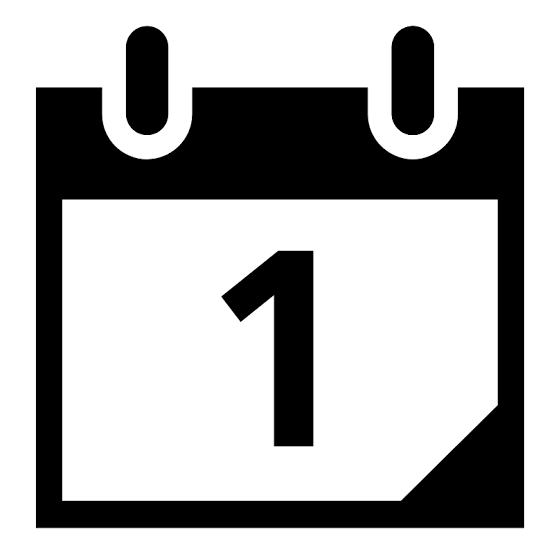  5 | تاریخ  Date |
| 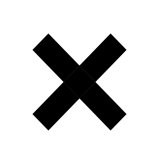  0 | 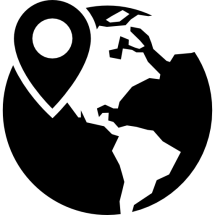  17 | 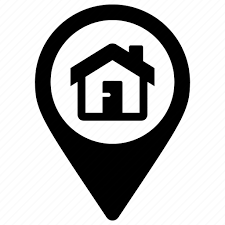  14 | 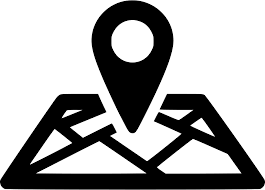  4 | 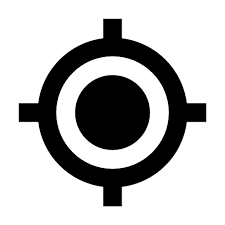  0 | مقام  Location |
| 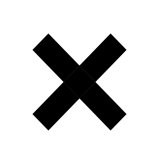  0 | 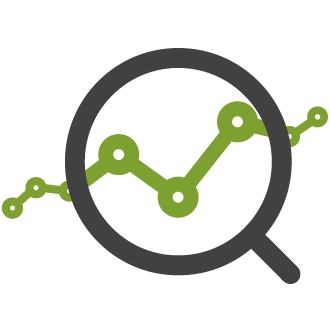  3 | 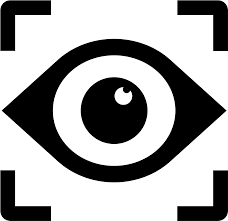  8 | 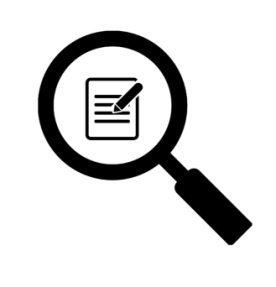  17 | 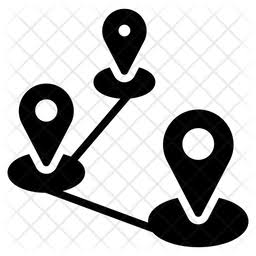  7 | شکایات کا سراغ لگانا  Complaints tracking |
