# Supplementary material for: Design and evaluation of an e-governance ICT solution to empower the non-literate vegetable market consumers
Source: PeerJ journal article supplement (doi:10.7717/peerj-cs.3150), 2025-09-23
Supplement: Data_for_submission.zip [file Assessment form 2 results.docx]

" Market Helper Vegetable" ایپلیکیشن میں استعمال ہونے والی شبیہوں کے لیے

تشخیصی فارم

| شبیہیں Icons | | شبیہوں کے نام | شبیہیں Icons | | شبیہوں کے نام |
| --- | --- | --- | --- | --- | --- |
| 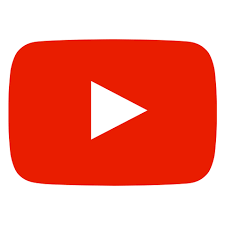  10 | 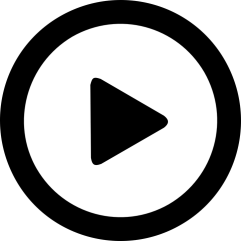  20 | آڈیو, ویڈیو چلائیں  Play (audio, video) | 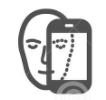  14 | 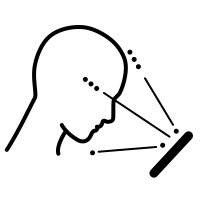16 | چہرے کی شناخت  Face recognition |
| 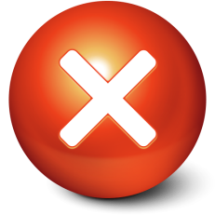  7 | 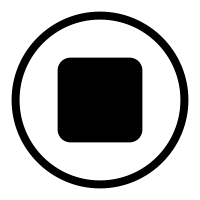  23 | آڈَیو، وڈیو بند کریں  Stop (audio, video) | 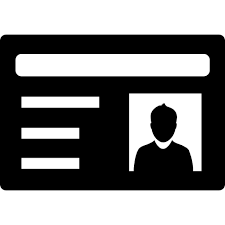  16 | 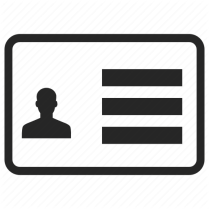  14 | شناختی کارڈ نمبر  ID card No |
| 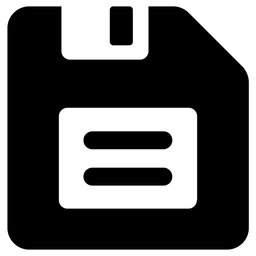  22 | 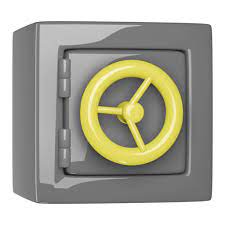  8 | محفوظ کریں  Save | 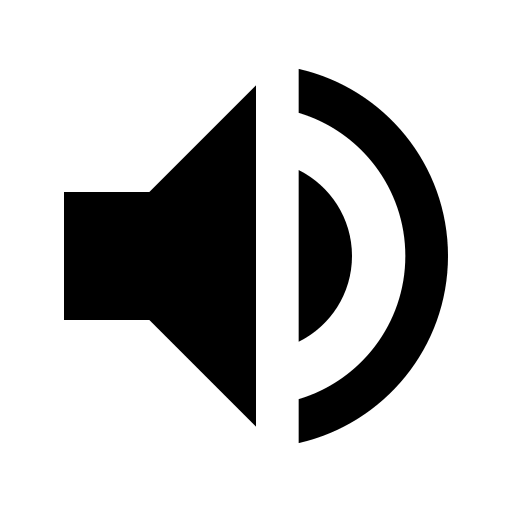  14 | 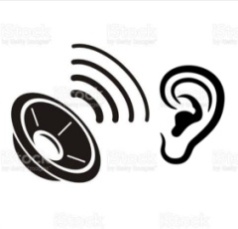  16 | آڈیو میں مدد  Audio  assistance |
| 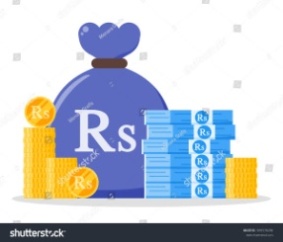  11 | 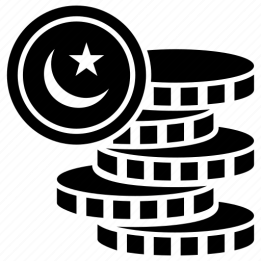  19 | متنازعہ قیمت  Controversial price | 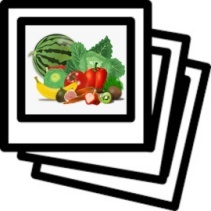  9 | 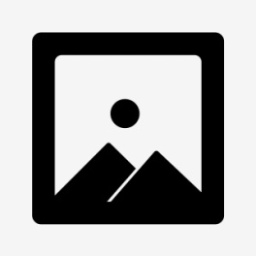  21 | گیلری  Gallery |
| 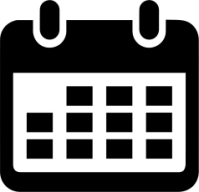  10 | 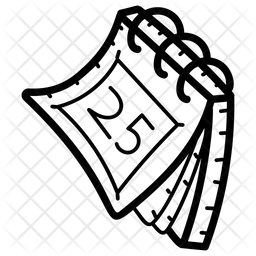  20 | تاریخ  Date | 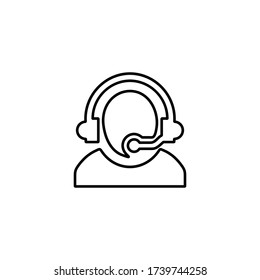  11 | 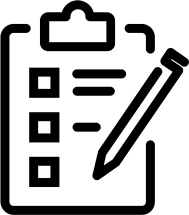  19 | شکا یت کا اندراج  Complaint registration |
| 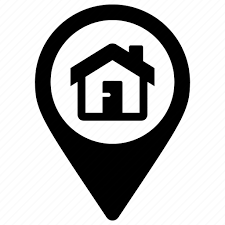  8 | 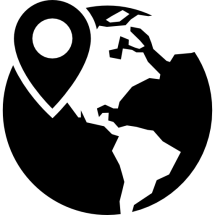  22 | مقام  Location | 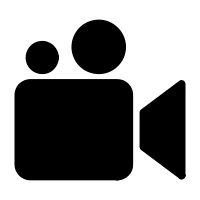  23 | 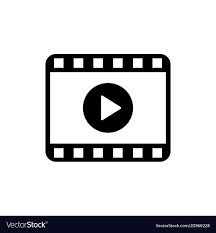  7 | ویڈیو ریکارڈنگ  Video recording |
| 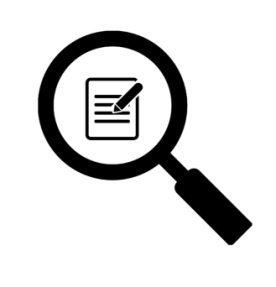  22 | 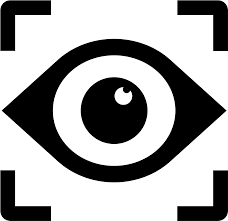  8 | شکایات کا سراغ لگانا  Complaints tracking | 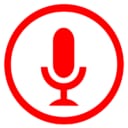  22 | 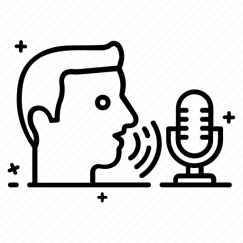  8 | آڈیو ریکارڈنگ  Audio recording |
