# Supplementary material for: Design and evaluation of an e-governance ICT solution to empower the non-literate vegetable market consumers
Source: PeerJ journal article supplement (doi:10.7717/peerj-cs.3150), 2025-09-23
Supplement: Data_for_submission.zip [file Audio assistance help.xlsx]

## Sheet: Sheet1
		Users	Task 1	Task 2	Task 3	Task 4	Task 5	Total				5	3	0	9	1
		1	5	3	0	9	1	18				0	1	0	4	1
		2	0	1	0	4	1	6				2	1	0	3	1
		3	2	1	0	3	1	7				2	2	0	7	1
		4	2	2	0	7	1	12				2	1	0	9	1
		5	2	1	0	9	1	13				2	2	0	4	1
		6	2	2	0	4	1	9				0	1	1	2	1
		7	0	1	1	2	1	5				2	1	0	7	2
		8	2	1	0	7	2	12				1	1	0	2	1
		9	1	1	0	2	1	5				0	1	0	5	1
		10	0	1	0	5	1	7				0	1	0	3	1
		11	0	1	0	3	1	5				2	1	1	4	1
		12	2	1	1	4	1	9				0	1	0	5	1
		13	0	1	0	5	1	7				2	1	0	5	1
		14	2	1	0	5	1	9				0	1	1	3	1
		15	0	1	1	3	1	6				1	2	1	1	2
		16	1	2	1	1	2	7				0	1	0	2	1
		17	0	1	0	2	1	4				2	1	1	3	1
		18	2	1	1	3	1	8				0	1	0	2	1
		19	0	1	0	2	1	4				1	1	0	8	1
		20	1	1	0	8	1	11				2	1	0	5	1
		21	2	1	0	5	1	9				2	1	1	5	1
		22	2	1	1	5	1	10				1	1	0	6	1
		23	1	1	0	6	1	9				2	2	1	8	2
		24	2	2	1	8	2	15				2	2	1	5	1
		25	2	2	1	5	1	11				2	1	0	7	2
		26	2	1	0	7	2	12				0	1	1	6	1
		27	0	1	1	6	1	9				1	1	0	7	1
		28	1	1	0	7	1	10				1	1	1	3	1
		29	1	1	1	3	1	7				3	2	1	5	2
		30	3	2	1	5	2	13				0	2	0	4	1
		31	0	2	0	4	1	7				1	2	1	4	2
		32	1	2	1	4	2	10				2	2	2	4	2
		33	2	2	2	4	2	12				2	2	0	2	1
		34	2	2	0	2	1	7				2	1	0	5	1
		35	2	1	0	5	1	9				2	2	0	6	2
		36	2	2	0	6	2	12				2	2	1	5	2
		37	2	2	1	5	2	12				0	2	1	5	2
		38	0	2	1	5	2	10				2	1	0	6	2
		39	2	1	0	6	2	11				2	2	1	9	2
		40	2	2	1	9	2	16			Average	1.375	1.4	0.425	4.875	1.3
		Total	55	56	17	195	52
