# Supplementary material for: Design and evaluation of an e-governance ICT solution to empower the non-literate vegetable market consumers
Source: PeerJ journal article supplement (doi:10.7717/peerj-cs.3150), 2025-09-23

**Research Title:** Design and Evaluation of an E-Governance ICT Solution to Empower Non-literate Population

**Author 1:** Dr. Syed Afzal Moshadi Shah

**Author 2:** Ms. Anam Arif

**Author 3:** Dr. Iftikhar Ahmed Khan

**Author 4:** Dr. Abdul Nasir Khan

**Author 5:** Dr. Qazi Mudassar Ilyas

I/We hereby declare that the study has followed ethical standards prior, during and after the aforesaid study. We declare,

- That, all procedures performed in studies involving human participants were in accordance with the ethical standards of the institutional and/or national research committee and with the 1964 Helsinki Declaration and its later amendments or comparable ethical standards.
- That, there is no third-party funding availed for the study. Hence the research activity was self-funded, and it does not require any acknowledgment of donors.
- That, this article does not contain any studies involving animals performed by any of the authors.
- That, there exists no conflict of interest among any authors.

**Author 1:** Syed Afzal Moshadi Shah



**Author 2:** Ms. Anam Arif

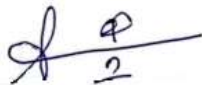

**Author 3:** Iftikhar Ahmed Khan



**Author 4:** Abdul Nasir Khan



**Author 5:** Qazi Mudassar Ilyas



Supplement: Data_for_submission.zip [file Authors signs of ethical compliance.pdf › Authors signs of ethical compliance.pdf]
