# Supplementary material for: Design and evaluation of an e-governance ICT solution to empower the non-literate vegetable market consumers
Source: PeerJ journal article supplement (doi:10.7717/peerj-cs.3150), 2025-09-23
Supplement: Data_for_submission.zip [file consent form.docx]

**
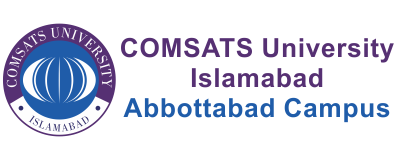
**

**Consent Form**

**Design and Evaluation of an Image Processing based Vegetable Market Helper Prototype to Empower Non-literate Population of Pakistan**

Researcher: Anam Arif

**Purpose:** The Purpose of this research is to design an ICT based solution that could help illiterate and semi-illiterate population to access the rate lists of fruits and vegetables provided by government, to report any anomalies in rates to the government authorities in the form of complaints and to track their complaints.

**Voluntary Participation:** Your participation in this study is completely voluntary. You may decline to answer any or all questions and you may terminate your involvement at any time. If you decide to take part in this study, you will be asked to sign a consent form. If you withdraw from the study before data collection is completed, your data will be returned to you or destroyed. You may be asked to participate in follow-up studies, in which you will complete (shorter) questionnaires. Completing this interview in no way obliges you to participate in follow-up studies.

**Duration:** This interview will take 15-20 minutes to complete. You can stop participating at any time without penalty.

**Risks and benefits:** There are no known risks or discomforts associated with this study. The results obtained will be applied in the final prototype of Vegetable market helper.

**Confidentiality:** Information produced by this study will be stored in the investigator’s file. Information contained in your records may not be given to anyone unaffiliated with the study in a form that could identify you without your written consent, except as required by law.

In addition, the photographs, audiotapes, or videotapes that were taken during the interview could identify you, you must give special permission for their use. In that case, you will be given the opportunity to view or listen, as applicable, to the photographs, audiotapes, or videotapes before you give your permission for their use.

**Consent:** I have read, and I understand the provided information and have had the opportunity to ask questions. I understand that my participation is voluntary and that I am free to withdraw at any time, without giving a reason and without cost. I understand that I will be given a copy of this consent form. I voluntarily agree to take part in this study.

Participant's signature ______________________________ Date __________


Interviewer’s signature _____________________________ Date __________
