# Supplementary material for: Design and evaluation of an e-governance ICT solution to empower the non-literate vegetable market consumers
Source: PeerJ journal article supplement (doi:10.7717/peerj-cs.3150), 2025-09-23
Supplement: Data_for_submission.zip [file consent in Urdu.docx]

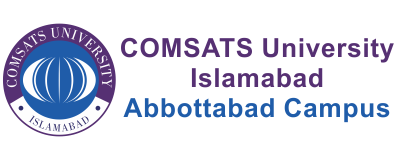
اجازت نامہ

**Design and Evaluation of an Image Processing based Vegetable Market Helper Prototype to Empower Non-literate Population of Pakistan**

محقق: انعم عارف

مقصد: اس تحقیق کا مقصد ایک آئ سی ٹی پر مبنی حل تیار کرنا ہے۔ جس سے ناخواندہ اور نیم ناخواندہ آبادی کو حکومت کی طرف سے فراہم کردہ پھلوں اور سبزیوں کی ریٹ لسٹ تک رسائ حاصل کرنے میں مدد مل سکے، نرخوں میں کسی بھی بے ضابطگی کی شکایت کی صورت میں سرکاری حکام کو اطلاٰع دی جا سکے۔ اور ان کی شکایات کا پتہ لگایا جا سکے۔

رضاکارانہ شرکت: اس مطالعہ میں آپ کی شرکت مکمل طور پر رضاکارانہ ہے آپ کسی بھی یا تمام سوالات کا جواب دینے سے انکار کر سکتے ہیں اور اگر آپ چاہیں تو کسی بھی وقت اپنی شمولیت ختم کر سکتے ہیں۔ اگر آپ اس مطالعہ میں حصہ لینے کا فیصلہ کرتے ہیں، تو آپ سے رضامندی کے فارم پر دستخط کرنے کو کہا جائے گا۔ رضامندی کے فارم پر دستخط کرنے کے بعد، آپ کسی بھی وقت اور وجہ بتائے بغیر دستبردار ہونے کے لیے آزاد ہیں۔ اس مطالعہ سے دستبردار ہونے سے آپ کے تعلق پر اثر نہیں پڑے گا ۔ اگر آپ ڈیٹا اکٹھا کرنے سے پہلے مطالعہ سے دستبردار ہو جاتے ہیں، تو آپ کا ڈیٹا آپ کو واپس کر دیا جائے گا یا تباہ کر دیا جائے گا۔ آپ کو فالو اپ اسٹڈیز میں حصہ لینے کے لیے کہا جا سکتا ہے، جس میں آپ سوالنامے مکمل کریں گے۔ اس انٹرویو کو مکمل کرنا کسی بھی طرح آپ کو فالو اپ اسٹڈیز میں حصہ لینے کا پابند نہیں کرتا ہے۔

دورانیہ: اس انٹرویو کو مکمل ہونے میں تقریباً 15-20 منٹ لگیں گے۔ آپ کسی بھی وقت بغیر جرمانے کے شرکت کرنا بند کر سکتے ہیں۔

خطرات اور فوائد: اس مطالعے سے وابستہ کوئی خطرہ یا تکلیفیں معلوم نہیں ہیں۔ حاصل کردہ نتائج سبزی منڈی کے مددگار کے حتمی پروٹو ٹائپ میں لاگو کیے جائیں گے۔

رازداری: اس مطالعہ کے ذریعہ تیار کردہ معلومات کو تفتیش کار کی فائل میں محفوظ کیا جائے گا۔ آپ کے ریکارڈ میں موجود معلومات کسی بھی ایسے شخص کو نہیں دی جا سکتی جو اس مطالعے سے غیر وابستہ ہوں اس حالت میں کے جو آپ کی تحریری اجازت کے بغیر آپ کی شناخت کر سکے، سوائے قانون کے مطابق۔اس کے علاوہ، انٹرویو کے دوران جو تصویریں، آڈیو ٹیپس یا ویڈیو ٹیپس لی گئیں جو آپ کی شناخت کر سکیں، آپ کو ان کے استعمال کے لیے خصوصی اجازت دینی ہوگی۔ اس صورت میں، آپ کو تصویروں، آڈیو ٹیپس یا ویڈیو ٹیپس کے استعمال کی اجازت دینے سے پہلے، جیسا کہ قابل اطلاق ہو، دیکھنے یا سننے کا موقع دیا جائے گا۔

رضامندی: میں نے پڑھی ہے اور میں فراہم کردہ معلومات کو سمجھتا ہوں اور مجھے سوالات پوچھنے کا موقع ملا ہے۔ میں سمجھتا ہوں کہ میری شرکت رضاکارانہ ہے اور میں کسی بھی وقت، بغیر وجہ بتائے اور بغیر کسی قیمت کے دستبردار ہونے کے لیے آزاد ہوں۔ میں سمجھتا ہوں کہ مجھے اس رضامندی کے فارم کی ایک کاپی دی جائے گی۔ میں رضاکارانہ طور پر اس مطالعہ میں حصہ لینے کے لیے رضامند ہوں۔

شرکت کنندہ کے دستخط ______________________________ تاریخ _________

انٹرویو لینے والے کے دستخط __________________________ تاریخ _________
