# Supplementary material for: Design and evaluation of an e-governance ICT solution to empower the non-literate vegetable market consumers
Source: PeerJ journal article supplement (doi:10.7717/peerj-cs.3150), 2025-09-23
Supplement: Data_for_submission.zip [file ethics compliance certificate.pdf › ethics compliance certificate.pdf]

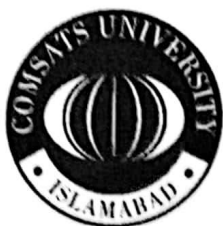

**COMSATS University Islamabad**  
**Abbottabad Campus**  
**Department of Computer Sciences**

No. CUI/ATD/CS/MS/23/005

March 01, 2023

**Certificate of Compliance with Ethical Standards**

It is certified that the research with title *"An E-Governance ICT Solution to Empower Non-literate Population – A Case Study of Pakistan"* is a part of MS studies carried out by **Ms. Anam Arif** under the supervision of **Dr. Iftikhar Ahmed Khan** as part of her requirement for the degree of MS in Computer Sciences has followed the required ethical standards. In particular,

| S.No | Ethical Concern Area                                                                                                                                                                                                                                                    | Action                                                                                                                        |
|------|-------------------------------------------------------------------------------------------------------------------------------------------------------------------------------------------------------------------------------------------------------------------------|-------------------------------------------------------------------------------------------------------------------------------|
| 1.   | All applicable international, national, and/or institutional guidelines for the care and use of animals were followed.                                                                                                                                                  | Not Applicable<br>(This thesis/article does not contain any studies involving animals performed by any of the authors).       |
| 2.   | All procedures performed in studies involving human participants were in accordance with the ethical standards of the institutional and/or national research committee and with the 1964 Helsinki Declaration and its later amendments or comparable ethical standards. | Applicable and addressed properly.<br>(Informed consent was obtained from all individual participants involved in the study). |

**Dr. Fiaz Gul Khan**

In-charge,

Graduate Program & Ethical Committee

Department of Computer Science,

COMSATS University Islamabad – Abbottabad Campus, Pakistan

Email: [fiazkhan@cuiatd.edu.pk](mailto:fiazkhan@cuiatd.edu.pk)

Cell: 0092-314-9801676

**Coordinator Graduate Program**  
Department of Computer Science  
COMSATS University Islamabad (CUI)  
Abbottabad Campus
