# Supplementary material for: Design and evaluation of an e-governance ICT solution to empower the non-literate vegetable market consumers
Source: PeerJ journal article supplement (doi:10.7717/peerj-cs.3150), 2025-09-23
Supplement: Data_for_submission.zip [file Help from researcher.xlsx]

## Sheet: Sheet1
		Users	Task 1	Task 2	Task 3	Task 4	Task 5	Total
		1	1	1	0	2	1	5			1	1	0	2	1
		2	1	0	0	1	1	3			1	0	0	1	1
		3	1	0	0	3	1	5			1	0	0	3	1
		4	1	1	0	2	1	5			1	1	0	2	1
		5	0	0	0	2	1	3			0	0	0	2	1
		6	1	1	0	1	0	3			1	1	0	1	0
		7	0	0	0	3	1	4			0	0	0	3	1
		8	2	1	0	1	0	4			2	1	0	1	0
		9	2	0	0	3	0	5			2	0	0	3	0
		10	2	0	0	2	1	5			2	0	0	2	1
		11	1	0	0	3	0	4			1	0	0	3	0
		12	3	0	0	3	1	7			3	0	0	3	1
		13	1	0	0	2	1	4			1	0	0	2	1
		14	2	0	0	2	1	5			2	0	0	2	1
		15	3	0	1	3	1	8			3	0	1	3	1
		16	3	0	0	1	0	4			3	0	0	1	0
		17	1	1	0	2	0	4			1	1	0	2	0
		18	0	1	0	0	1	2			0	1	0	0	1
		19	0	0	0	2	1	3			0	0	0	2	1
		20	2	1	0	3	1	7			2	1	0	3	1
		21	0	0	0	2	1	3			0	0	0	2	1
		22	2	0	1	3	0	6			2	0	1	3	0
		23	2	1	0	2	1	6			2	1	0	2	1
		24	3	1	0	2	1	7			3	1	0	2	1
		25	3	1	0	3	1	8			3	1	0	3	1
		26	2	0	1	3	1	7			2	0	1	3	1
		27	2	1	1	3	0	7			2	1	1	3	0
		28	2	1	1	2	1	7			2	1	1	2	1
		29	2	1	0	1	0	4			2	1	0	1	0
		30	3	0	0	3	1	7			3	0	0	3	1
		31	0	1	0	3	1	5			0	1	0	3	1
		32	0	0	0	2	1	3			0	0	0	2	1
		33	1	0	0	2	0	3			1	0	0	2	0
		34	1	0	1	2	0	4			1	0	1	2	0
		35	2	0	1	2	0	5			2	0	1	2	0
		36	2	0	1	2	0	5			2	0	1	2	0
		37	2	0	1	3	0	6			2	0	1	3	0
		38	2	1	1	2	0	6			2	1	1	2	0
		39	2	1	0	1	0	4			2	1	0	1	0
		40	3	1	0	1	1	6			3	1	0	1	1
		Total	63	17	10	85	24			Average	1.575	0.425	0.25	2.125	0.6
