# Supplementary material for: Design and evaluation of an e-governance ICT solution to empower the non-literate vegetable market consumers
Source: PeerJ journal article supplement (doi:10.7717/peerj-cs.3150), 2025-09-23
Supplement: Data_for_submission.zip [file No of attempts.xlsx]

## Sheet: Sheet1
		Users	Task 1	Task 2	Task 3	Task 4	Task 5	Total
		1	2	3	1	2	2	10
		2	1	1	1	2	2	7
		3	3	1	1	3	1	9
		4	2	4	1	2	2	11
		5	1	1	1	1	1	5
		6	2	2	1	3	2	10
		7	1	1	1	2	1	6
		8	2	2	1	5	3	13
		9	2	1	1	1	2	7
		10	1	1	1	1	1	5
		11	1	2	1	2	1	7			Error Value for Task 1 = 0.5				0.5
		12	3	2	1	3	2	11			Error Value for Task 2 = 0.35				0.35
		13	1	1	1	2	1	6			Error Value for Task 3 = 0.025				0.025
		14	2	1	1	1	1	6			Error Value for Task 4 = 0.725				0.725
		15	1	1	1	1	1	5			Error Value for Task 5 = 0.35				0.35
		16	2	2	1	2	2	9						Average	0.39
		17	1	1	1	1	1	5
		18	1	1	1	1	1	5
		19	1	1	1	1	1	5
		20	1	2	1	1	1	6
		21	2	1	1	2	1	7
		22	1	1	1	1	1	5
		23	2	1	1	2	2	8
		24	2	2	2	2	2	10
		25	2	2	1	2	1	8
		26	1	1	1	2	1	6
		27	2	1	1	3	1	8
		28	1	1	1	1	1	5
		29	2	1	1	2	1	7
		30	4	1	1	2	2	10
		31	1	1	1	1	1	5
		32	1	1	1	1	1	5
		33	1	1	1	1	1	5
		34	2	2	1	2	1	8
		35	2	1	1	1	1	6
		36	3	1	1	2	1	8
		37	1	1	1	1	2	6
		38	1	1	1	1	1	5
		39	2	1	1	1	1	6
		40	2	1	1	2	2	8
		Total	66	54	41	69	54
