# Supplementary material for: Design and evaluation of an e-governance ICT solution to empower the non-literate vegetable market consumers
Source: PeerJ journal article supplement (doi:10.7717/peerj-cs.3150), 2025-09-23
Supplement: Data_for_submission.zip [file SUS form.docx]

| بہت زیادہ  متفق | متفق | نہ متفق  نہ اختلاف | اختلاف | بہت زیادہ اختلاف | سوالات | نمبرشمار |
| --- | --- | --- | --- | --- | --- | --- |
|  |  |  |  |  | مجھے لگتا ہے کہ میں اس ایپلیکیشن کو کثرت سے استعمال کرنا چاہوں گا | ۱ |
|  |  |  |  |  | میں نے ایپلیکیشن کو غیر ضروری طور پر پیچیدہ پایا | ۲ |
|  |  |  |  |  | میں نے سوچا کہ ایپلی کیشن استعمال کرنا آسان ہے | ۳ |
|  |  |  |  |  | میرے خیال میں اس ایپلیکیشن کو استعمال کرنے کے لیے مجھے کسی تکنیکی شخص کی مدد کی ضرورت ہوگی | ۴ |
|  |  |  |  |  | میں نے پایا کہ اس ایپلی کیشن میں مختلف فنکشنز اچھی طرح سے مربوط ہیں | ۵ |
|  |  |  |  |  | میں نے سوچا کہ اس ایپلیکیشن میں بہت زیادہ تضاد ہے | ۶ |
|  |  |  |  |  | میں تصور کروں گا کہ زیادہ تر لوگ اس ایپلیکیشن کو بہت تیزی سے استعمال کرنا سیکھ لیں گے | ۷ |
|  |  |  |  |  | مجھے ایپلی کیشن کو استعمال کرنا بہت مشکل لگا | ۸ |
|  |  |  |  |  | میں نے ایپلی کیشن کا استعمال کرتے ہوئے بہت پر اعتماد محسوس کیا | ۹ |
|  |  |  |  |  | اس موبائل ایپلیکیشن کو استعمال کرنے سے پہلے مجھے بہت سی چیزیں سیکھنے کی ضرورت ہے | ۱۰ |

**System Usability Scale**
