# Supplementary material for: Design and evaluation of an e-governance ICT solution to empower the non-literate vegetable market consumers
Source: PeerJ journal article supplement (doi:10.7717/peerj-cs.3150), 2025-09-23
Supplement: Data_for_submission.zip [file SUS Score.xlsx]

## Sheet: Sheet1
										SUS Score
								X	Y	X = X-5	Y = 25 - Y	( X + Y) * 2.5 =
								23	13	18	12	30	2.5	75
								24	16	19	9	28	2.5	70
								21	14	16	11	27	2.5	67.5
								23	15	18	10	28	2.5	70
								23	16	18	9	27	2.5	67.5
								24	12	19	13	32	2.5	80
								22	16	17	9	26	2.5	65
								25	10	20	15	35	2.5	87.5
								23	15	18	10	28	2.5	70
								22	15	17	10	27	2.5	67.5
								21	16	16	9	25	2.5	62.5
								19	17	14	8	22	2.5	55
								23	19	18	6	24	2.5	60
								19	18	14	7	21	2.5	52.5
								19	19	14	6	20	2.5	50
								23	8	18	17	35	2.5	87.5
								20	10	15	15	30	2.5	75
								23	15	18	10	28	2.5	70
								20	15	15	10	25	2.5	62.5
								22	10	17	15	32	2.5	80
								25	5	20	20	40	2.5	100
								20	11	15	14	29	2.5	72.5
								20	13	15	12	27	2.5	67.5
								25	11	20	14	34	2.5	85
								19	13	14	12	26	2.5	65
								19	13	14	12	26	2.5	65
								25	5	20	20	40	2.5	100
								21	18	16	7	23	2.5	57.5
								21	13	16	12	28	2.5	70
								18	14	13	11	24	2.5	60
								18	17	13	8	21	2.5	52.5
								15	14	10	11	21	2.5	52.5
								18	17	13	8	21	2.5	52.5
								15	19	10	6	16	2.5	40
								23	13	18	12	30	2.5	75
								21	12	16	13	29	2.5	72.5
								16	10	11	15	26	2.5	65
								18	11	13	14	27	2.5	67.5
								18	13	13	12	25	2.5	62.5
								15	9	10	16	26	2.5	65
												Average =		68.0625
