# Supplementary material for: Design and evaluation of an e-governance ICT solution to empower the non-literate vegetable market consumers
Source: PeerJ journal article supplement (doi:10.7717/peerj-cs.3150), 2025-09-23
Supplement: Data_for_submission.zip [file Tapping Behaviour.xlsx]

## Sheet: Sheet1
		Users	Task 1	Task 2	Task 3	Task 4	Task 5	Total
		1	11	8	1	18	4	42
		2	4	2	1	16	3	26
		3	7	2	1	15	3	28
		4	5	6	1	19	4	35
		5	5	3	1	23	2	34
		6	7	4	1	17	5	34
		7	4	2	2	14	2	24
		8	6	4	1	21	7	39
		9	4	2	1	15	4	26
		10	4	2	1	17	2	26
		11	4	3	1	17	3	28
		12	8	4	2	18	7	39
		13	4	2	1	16	3	26
		14	6	3	1	12	2	24
		15	4	3	2	16	2	27
		16	4	5	2	15	3	29
		17	4	2	1	13	2	22
		18	5	3	2	21	2	33
		19	4	2	1	17	3	27
		20	4	4	1	18	2	29
		21	7	2	1	18	3	31
		22	5	2	2	19	2	30
		23	5	2	1	15	4	27
		24	4	5	2	16	5	32
		25	6	4	2	15	3	30
		26	5	2	1	25	4	37
		27	7	2	2	31	3	45
		28	4	2	1	21	2	30
		29	4	2	2	17	3	28
		30	12	3	2	19	6	42
		31	4	3	1	19	3	30
		32	4	4	2	16	5	31
		33	5	3	3	17	5	33
		34	6	5	1	13	3	28
		35	5	2	1	18	3	29
		36	9	3	1	20	4	37
		37	5	4	2	19	7	37
		38	4	3	2	17	6	32
		39	7	2	1	19	4	33
		40	8	5	2	21	5	41
		Total	220	126	57	713	145
