# Supplementary material for: Design and evaluation of an e-governance ICT solution to empower the non-literate vegetable market consumers
Source: PeerJ journal article supplement (doi:10.7717/peerj-cs.3150), 2025-09-23
Supplement: Data_for_submission.zip [file Task completion time.xlsx]

## Sheet: Sheet1
												Time based efficiency															Overall relative efficiency
										Task 1	in sec	1/time	Task 2	in sec	1/time	Task 3	1/time	Task 4	in sec	1/time	Task 5	1/time			Task 1	in sec	1 * time	Task 2	in sec	1 * time	Task 3	1 * time	Task 4	in sec	1 * time	Task 5	1 * time
		Users	Task 1	Task 2	Task 3	Task 4	Task 5	Total		00:02:30	150	0.0066	00:01:43	103	0.0097	00:00:26	0.0384	00:03:00	180	0.0055	00:00:50	0.02			00:02:30	150	150	00:01:43	103	103	00:00:26	26	00:03:00	180	180	00:00:50	50
		1	00:02:30	00:01:43	00:00:26	00:03:00	00:00:50	00:08:29		00:01:45	105	0.0095	00:01:02	62	0.01612	00:00:32	0.03125	00:03:02	182	0.0054	00:00:30	0.0333			00:01:45	105	105	00:01:02	62	62	00:00:32	32	00:03:02	182	182	00:00:30	30
		2	00:01:45	00:01:02	00:00:32	00:03:02	00:00:30	1900-01-02 00:06:51		00:02:32	152	0.0065	00:01:33	93	0.01075	00:00:41	0.0243	00:03:14	194	0.0051	00:00:34	0.029			00:02:32	152	152	00:01:33	93	93	00:00:41	41	00:03:14	194	194	00:00:34	34
		3	00:02:32	00:01:33	00:00:41	00:03:14	00:00:34	1900-01-03 00:08:34		00:02:45	165	0.006	00:01:40	100	0.01	00:00:30	0.03333	00:02:25	145	0.0068	00:00:59	0.0169			00:02:45	165	165	00:01:40	100	100	00:00:30	30	00:02:25	145	145	00:00:59	59
		4	00:02:45	00:01:40	00:00:30	00:02:25	00:00:59	1900-01-04 00:08:19		00:01:57	117	0.0085	00:01:02	62	0.01612	00:00:49	0.0204	00:03:00	180	0.0055	00:00:43	0.02325			00:01:57	117	117	00:01:02	62	62	00:00:49	49	00:03:00	180	180	00:00:43	43
		5	00:01:57	00:01:02	00:00:49	00:03:00	00:00:43	1900-01-05 00:07:31		00:02:00	120	0.0083	00:01:10	70	0.01428	00:00:43	0.02325	00:03:01	181	0.00552	00:00:53	0.0188			00:02:00	120	120	00:01:10	70	70	00:00:43	43	00:03:01	181	181	00:00:53	53
		6	00:02:00	00:01:10	00:00:43	00:03:01	00:00:53	1900-01-06 00:07:47		00:02:01	121	0.0082	00:00:59	59	0.01694	00:00:36	0.02777	00:02:58	178	0.0056	00:00:47	0.0212			00:02:01	121	121	00:00:59	59	59	00:00:36	36	00:02:58	178	178	00:00:47	47
		7	00:02:01	00:00:59	00:00:36	00:02:58	00:00:47	1900-01-07 00:07:21		00:02:00	120	0.0083	00:01:47	107	0.00934	00:00:32	0.03125	00:03:00	180	0.0055	00:00:49	0.0204			00:02:00	120	120	00:01:47	107	107	00:00:32	32	00:03:00	180	180	00:00:49	49
		8	00:02:00	00:01:47	00:00:32	00:03:00	00:00:49	1900-01-08 00:08:08		00:01:59	119	0.0084	00:01:24	84	0.0119	00:00:41	0.02439	00:02:32	152	0.0065	00:00:51	0.0196			00:01:59	119	119	00:01:24	84	84	00:00:41	41	00:02:32	152	152	00:00:51	51
		9	00:01:59	00:01:24	00:00:41	00:02:32	00:00:51	1900-01-09 00:07:27		00:01:50	110	0.009	00:01:40	100	0.01	00:00:49	0.0204	00:02:41	161	0.0062	00:00:40	0.025			00:01:50	110	110	00:01:40	100	100	00:00:49	49	00:02:41	161	161	00:00:40	40
		10	00:01:50	00:01:40	00:00:49	00:02:41	00:00:40	1900-01-10 00:07:40		00:01:45	105	0.0095	00:01:20	80	0.0125	00:00:30	0.03333	00:03:02	182	0.0054	00:00:43	0.0232			00:01:45	105	105	00:01:20	80	80	00:00:30	30	00:03:02	182	182	00:00:43	43
		11	00:01:45	00:01:20	00:00:30	00:03:02	00:00:43	1900-01-11 00:07:20		00:02:35	155	0.0064	00:01:39	99	0.0101	00:00:25	0.04	00:02:43	163	0.0061	00:00:51	0.0196			00:02:35	155	155	00:01:39	99	99	00:00:25	25	00:02:43	163	163	00:00:51	51
		12	00:02:35	00:01:39	00:00:25	00:02:43	00:00:51	1900-01-12 00:08:13		00:01:59	119	0.0084	00:01:30	90	0.01111	00:00:31	0.03225	00:03:00	180	0.0055	00:00:43	0.02325			00:01:59	119	119	00:01:30	90	90	00:00:31	31	00:03:00	180	180	00:00:43	43
		13	00:01:59	00:01:30	00:00:31	00:03:00	00:00:43	1900-01-13 00:07:43		00:02:30	150	0.0066	00:01:40	100	0.01	00:00:41	0.0243	00:02:50	170	0.0058	00:00:54	0.0185			00:02:30	150	150	00:01:40	100	100	00:00:41	41	00:02:50	170	170	00:00:54	54
		14	00:02:30	00:01:40	00:00:41	00:02:50	00:00:54	1900-01-14 00:08:35		00:01:51	111	0.009	00:01:35	95	0.01052	00:00:27	0.03703	00:02:40	160	0.00625	00:00:46	0.0217			00:01:51	111	111	00:01:35	95	95	00:00:27	27	00:02:40	160	160	00:00:46	46
		15	00:01:51	00:01:35	00:00:27	00:02:40	00:00:46	1900-01-15 00:07:19		00:01:44	104	0.0096	00:01:40	100	0.01	00:00:29	0.03448	00:02:30	150	0.0066	00:00:51	0.0196			00:01:44	104	104	00:01:40	100	100	00:00:29	29	00:02:30	150	150	00:00:51	51
		16	00:01:44	00:01:40	00:00:29	00:02:30	00:00:51	1900-01-16 00:07:14		00:01:32	92	0.01086	00:01:30	90	0.01111	00:00:32	0.03125	00:02:52	172	0.0058	00:00:33	0.0303			00:01:32	92	92	00:01:30	90	90	00:00:32	32	00:02:52	172	172	00:00:33	33
		17	00:01:32	00:01:30	00:00:32	00:02:52	00:00:33	1900-01-17 00:06:59		00:01:34	94	0.01063	00:01:32	92	0.01086	00:00:28	0.0357	00:02:50	170	0.0058	00:00:50	0.02			00:01:34	94	94	00:01:32	92	92	00:00:28	28	00:02:50	170	170	00:00:50	50
		18	00:01:34	00:01:32	00:00:28	00:02:50	00:00:50	1900-01-18 00:07:14		00:01:05	65	0.0153	00:01:05	65	0.01538	00:00:25	0.04	00:02:26	146	0.0068	00:00:47	0.0212			00:01:05	65	65	00:01:05	65	65	00:00:25	25	00:02:26	146	146	00:00:47	47
		19	00:01:05	00:01:05	00:00:25	00:02:26	00:00:47	1900-01-19 00:05:48		00:01:35	95	0.01052	00:01:32	92	0.01086	00:00:21	0.04761	00:02:51	171	0.0058	00:00:53	0.0188			00:01:35	95	95	00:01:32	92	92	00:00:21	21	00:02:51	171	171	00:00:53	53
		20	00:01:35	00:01:32	00:00:21	00:02:51	00:00:53	1900-01-20 00:07:12		00:02:00	120	0.0083	00:01:05	65	0.01538	00:00:25	0.04	00:02:41	161	0.0062	00:00:40	0.025			00:02:00	120	120	00:01:05	65	65	00:00:25	25	00:02:41	161	161	00:00:40	40
		21	00:02:00	00:01:05	00:00:25	00:02:41	00:00:40	1900-01-21 00:06:51		00:01:31	91	0.01098	00:01:09	69	0.014492	00:00:20	0.05	00:02:36	156	0.0064	00:00:39	0.0256			00:01:31	91	91	00:01:09	69	69	00:00:20	20	00:02:36	156	156	00:00:39	39
		22	00:01:31	00:01:09	00:00:20	00:02:36	00:00:39	1900-01-22 00:06:15		00:01:35	95	0.01052	00:01:12	72	0.01388	00:00:30	0.03333	00:02:45	165	0.00606	00:00:56	0.01785			00:01:35	95	95	00:01:12	72	72	00:00:30	30	00:02:45	165	165	00:00:56	56
		23	00:01:35	00:01:12	00:00:30	00:02:45	00:00:56	1900-01-23 00:06:58		00:01:42	102	0.0098	00:01:44	104	0.0096	00:00:29	0.03448	00:02:42	162	0.00617	00:00:37	0.02702			00:01:42	102	102	00:01:44	104	104	00:00:29	29	00:02:42	162	162	00:00:37	37
		24	00:01:42	00:01:44	00:00:29	00:02:42	00:00:37	1900-01-24 00:07:14		00:01:42	102	0.0098	00:01:30	90	0.01111	00:00:21	0.04761	00:02:31	151	0.00662	00:00:47	0.0212			00:01:42	102	102	00:01:30	90	90	00:00:21	21	00:02:31	151	151	00:00:47	47
		25	00:01:42	00:01:30	00:00:21	00:02:31	00:00:47	1900-01-25 00:06:51		00:01:40	100	0.01	00:01:00	60	0.01666	00:00:22	0.04545	00:02:33	153	0.00653	00:00:40	0.025			00:01:40	100	100	00:01:00	60	60	00:00:22	22	00:02:33	153	153	00:00:40	40
		26	00:01:40	00:01:00	00:00:22	00:02:33	00:00:40	1900-01-26 00:06:15		00:01:48	108	0.0092	00:01:32	92	0.01086	00:00:32	0.03125	00:03:00	180	0.0055	00:00:33	0.0303			00:01:48	108	108	00:01:32	92	92	00:00:32	32	00:03:00	180	180	00:00:33	33
		27	00:01:48	00:01:32	00:00:32	00:03:00	00:00:33	1900-01-27 00:07:25		00:01:50	110	0.009	00:01:23	83	0.01204	00:00:21	0.04761	00:02:44	164	0.00609	00:00:30	0.03333			00:01:50	110	110	00:01:23	83	83	00:00:21	21	00:02:44	164	164	00:00:30	30
		28	00:01:50	00:01:23	00:00:21	00:02:44	00:00:30	1900-01-28 00:06:48		00:01:54	114	0.0087	00:01:22	82	0.01219	00:00:26	0.03846	00:02:35	155	0.00645	00:00:41	0.0243			00:01:54	114	114	00:01:22	82	82	00:00:26	26	00:02:35	155	155	00:00:41	41
		29	00:01:54	00:01:22	00:00:26	00:02:35	00:00:41	1900-01-29 00:06:58		00:01:50	110	0.009	00:01:01	61	0.01639	00:00:34	0.02941	00:02:56	176	0.00568	00:00:35	0.0285			00:01:50	110	110	00:01:01	61	61	00:00:34	34	00:02:56	176	176	00:00:35	35
		30	00:01:50	00:01:01	00:00:34	00:02:56	00:00:35	1900-01-30 00:06:56		00:01:41	101	0.0099	00:01:04	64	0.015625	00:00:21	0.04761	00:02:22	142	0.00724	00:00:41	0.0243			00:01:41	101	101	00:01:04	64	64	00:00:21	21	00:02:22	142	142	00:00:41	41
		31	00:01:41	00:01:04	00:00:21	00:02:22	00:00:41	1900-01-31 00:06:09		00:01:40	100	0.01	00:01:24	84	0.0119	00:00:24	0.04166	00:02:45	165	0.00606	00:00:40	0.025			00:01:40	100	100	00:01:24	84	84	00:00:24	24	00:02:45	165	165	00:00:40	40
		32	00:01:40	00:01:24	00:00:24	00:02:45	00:00:40	1900-02-01 00:06:53		00:01:35	95	0.01052	00:01:21	81	0.012345	00:00:31	0.03225	00:02:45	165	0.00606	00:00:50	0.02			00:01:35	95	95	00:01:21	81	81	00:00:31	31	00:02:45	165	165	00:00:50	50
		33	00:01:35	00:01:21	00:00:31	00:02:45	00:00:50	1900-02-02 00:07:02		00:01:44	104	0.0096	00:01:30	90	0.01111	00:00:30	0.03333	00:02:44	164	0.00609	00:00:34	0.0294			00:01:44	104	104	00:01:30	90	90	00:00:30	30	00:02:44	164	164	00:00:34	34
		34	00:01:44	00:01:30	00:00:30	00:02:44	00:00:34	1900-02-03 00:07:02		00:01:35	95	0.01052	00:01:43	103	0.0097	00:00:22	0.04545	00:02:36	156	0.0064	00:00:40	0.025			00:01:35	95	95	00:01:43	103	103	00:00:22	22	00:02:36	156	156	00:00:40	40
		35	00:01:35	00:01:43	00:00:22	00:02:36	00:00:40	1900-02-04 00:06:56		00:01:44	104	0.0096	00:01:30	90	0.01111	00:00:41	0.0243	00:02:39	159	0.00628	00:00:39	0.0256			00:01:44	104	104	00:01:30	90	90	00:00:41	41	00:02:39	159	159	00:00:39	39
		36	00:01:44	00:01:30	00:00:41	00:02:39	00:00:39	1900-02-05 00:07:13		00:01:45	105	0.0095	00:01:30	90	0.01111	00:00:21	0.04761	00:02:41	161	0.00621	00:00:57	0.0175			00:01:45	105	105	00:01:30	90	90	00:00:21	21	00:02:41	161	161	00:00:57	57
		37	00:01:45	00:01:30	00:00:21	00:02:41	00:00:57	1900-02-06 00:07:14		00:01:36	96	0.0104	00:01:28	88	0.01136	00:00:33	0.0303	00:02:30	150	0.006666	00:00:36	0.02777			00:01:36	96	96	00:01:28	88	88	00:00:33	33	00:02:30	150	150	00:00:36	36
		38	00:01:36	00:01:28	00:00:33	00:02:30	00:00:36	1900-02-07 00:06:43		00:01:42	102	0.0098	00:01:30	90	0.01111	00:00:22	0.04545	00:02:35	155	0.00645	00:00:51	0.0196			00:01:42	102	102	00:01:30	90	90	00:00:22	22	00:02:35	155	155	00:00:51	51
		39	00:01:42	00:01:30	00:00:22	00:02:35	00:00:51	1900-02-08 00:07:00		00:01:34	94	0.01063	00:01:23	83	0.01204	00:00:18	0.05555	00:02:52	172	0.00581	00:00:38	0.0263			00:01:34	94	94	00:01:23	83	83	00:00:18	18	00:02:52	172	172	00:00:38	38
		40	00:01:34	00:01:23	00:00:18	00:02:52	00:00:38	1900-02-09 00:06:45	Total			0.37188			0.487602		1.4318			0.242436		0.94217	3.47589	total			4417			3384		1191			6609		1751	17352
		Average	00:01:50.425000	00:01:24.600000	00:00:29.775000	00:02:45.225000	00:00:43.775000
									Time based efficiency for Task 1= 0.009297																			Overall relative efficiency = 100%
									time based efficiency for Task 2= 0.01219005
									time based efficiency for Task 3= 0.035795																	Users	Task 1	Task 2	Task 3	Task 4	Task 5
									time based efficiency for Task 4= 0.0060609																	1	150	103	26	180	50
									time based efficiency for Task 5= 0.02355425																	2	105	62	32	182	30
									Time based efficiency for all tasks = 0.017 goals/sec																	3	152	93	41	194	34
																										4	165	100	30	145	59
																										5	117	62	49	180	43
																										6	120	70	43	181	53
																										7	121	59	36	178	47
																										8	120	107	32	180	49
																										9	119	84	41	152	51
																										10	110	100	49	161	40
																										11	105	80	30	182	43
																										12	155	99	25	163	51
																										13	119	90	31	180	43
																										14	150	100	41	170	54
																										15	111	95	27	160	46
																										16	104	100	29	150	51
																										17	92	90	32	172	33
																										18	94	92	28	170	50
																										19	65	65	25	146	47
																										20	95	92	21	171	53
																										21	120	65	25	161	40
																										22	91	69	20	156	39
																										23	95	72	30	165	56
																										24	102	104	29	162	37
																										25	102	90	21	151	47
																										26	100	60	22	153	40
																										27	108	92	32	180	33
																										28	110	83	21	164	30
																										29	114	82	26	155	41
																										30	110	61	34	176	35
																										31	101	64	21	142	41
																										32	100	84	24	165	40
																										33	95	81	31	165	50
																										34	104	90	30	164	34
																										35	95	103	22	156	40
																										36	104	90	41	159	39
																										37	105	90	21	161	57
																										38	96	88	33	150	36
																										39	102	90	22	155	51
																										40	94	83	18	172	38
