# Supplementary material for: Design and evaluation of an e-governance ICT solution to empower the non-literate vegetable market consumers
Source: PeerJ journal article supplement (doi:10.7717/peerj-cs.3150), 2025-09-23
Supplement: SUS_Scale.docx [file SUS_Scale.docx]

**
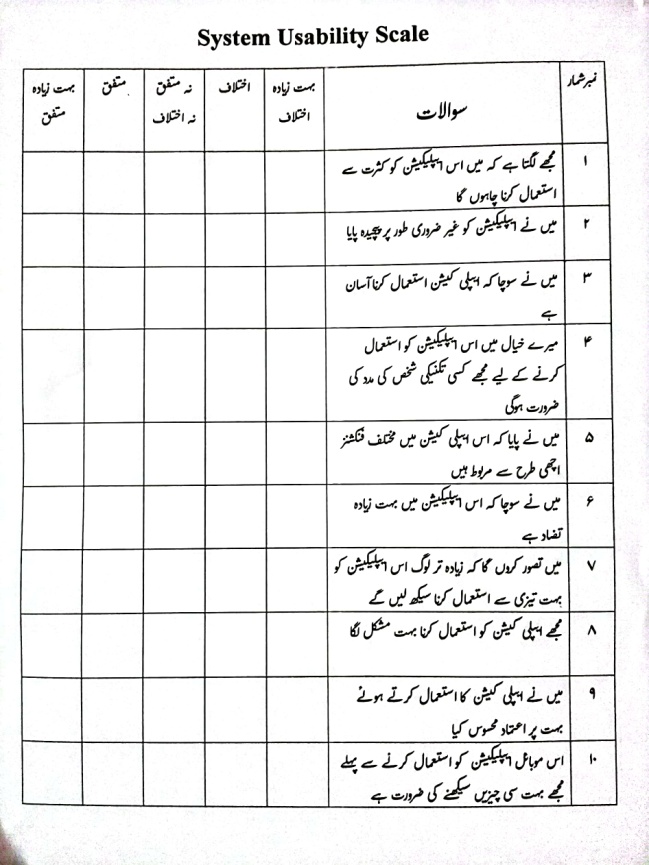
Appendix C**: SUS Questionnaire (Urdu and English)

**System Usability Scale: English version**

| **Number** | **Questions** | **Strongly Disagree** | **Disagree** | **Neutral** | **Agree** | **Strongly Agree** |
| --- | --- | --- | --- | --- | --- | --- |
| 1 | I think that I would like to use this application frequently. |  |  |  |  |  |
| 2 | I found the application unnecessarily complex. |  |  |  |  |  |
| 3 | I thought the application was easy to use. |  |  |  |  |  |
| 4 | I think that I would need the support of a technical person to be able to use this application. |  |  |  |  |  |
| 5 | I found the various functions in this application well integrated. |  |  |  |  |  |
| 6 | I thought there was too much inconsistency in this application. |  |  |  |  |  |
| 7 | I would imagine that most people would learn to use this application very quickly. |  |  |  |  |  |
| 8 | I found the application very cumbersome to use. |  |  |  |  |  |
| 9 | I felt very confident using the application. |  |  |  |  |  |
| 10 | I needed to learn a lot of things before I could get going with this application. |  |  |  |  |  |
