# Supplementary figures and images for: Design and evaluation of an e-governance ICT solution to empower the non-literate vegetable market consumers
Source: PeerJ journal article supplement (doi:10.7717/peerj-cs.3150), 2025-09-23

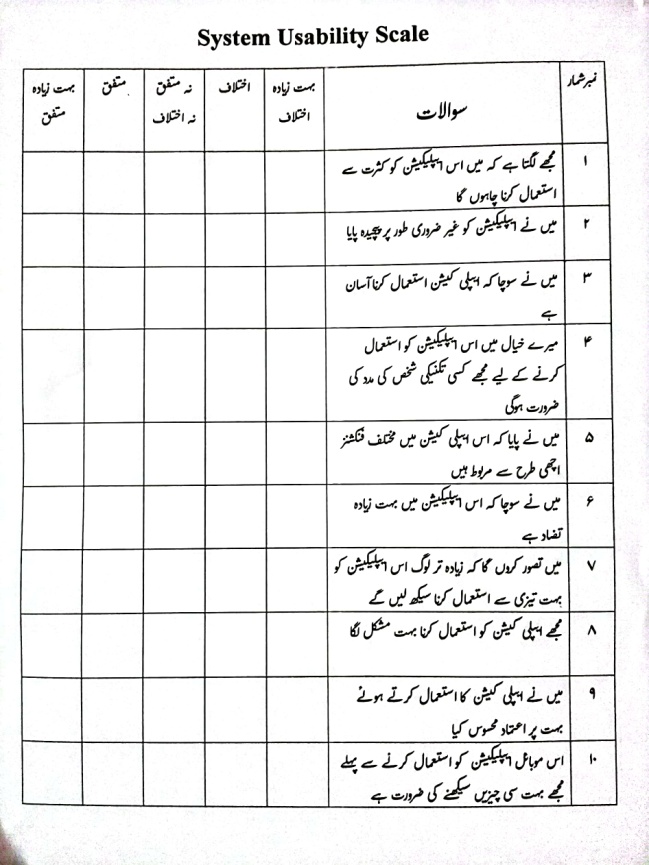

Supplement: Data_for_submission.zip [file Urdu SUS Scale.docx]
